# Supplementary material for: Quenching of syn-bimane fluorescence by Na+ complexation
Source: Royal Society of Chemistry journal article supplement (doi:10.1039/c8nj01945b), 2018-01-01
Supplement: c8nj01945b1.pdf [file c8nj01945b1.pdf]

## Supplementary Information

### Quenching of *syn*-Bimane Fluorescence by Na<sup>+</sup> Complexation

**Ankana Roy,<sup>a</sup> Partha Jyoti Das,<sup>a</sup> Yael Diskin-Posner,<sup>b</sup>  
Michael Firer,<sup>c</sup> Flavio Grynszpan,<sup>a,\*</sup> Michael Montag,<sup>a,\*</sup>**

---

<sup>a</sup> A. Roy, P. J. Das, Dr. F. Grynszpan, Dr. M. Montag  
Department of Chemical Sciences  
Ariel University  
Ariel 40700, Israel  
Fax: (+972)3-906-6634  
E-mail: michaelmo@ariel.ac.il, flaviog@ariel.ac.il

<sup>b</sup> Dr. Y. Diskin-Posner  
Department of Chemical Research Support  
Weizmann Institute of Science  
Rehovot 76100, Israel

<sup>c</sup> Prof. M. Firer  
Department of Chemical Engineering and Biotechnology  
Ariel University  
Ariel 40700, Israel

## Table of Contents

|                                                           |           |
|-----------------------------------------------------------|-----------|
| General procedures and analytical methods                 | S1 - S3   |
| Compound synthesis, characterization and NMR spectroscopy | S3 - S13  |
| X-ray crystallography                                     | S13 - S22 |
| UV-Vis absorbance and fluorescence spectroscopies         | S23 - S40 |
| Infrared spectroscopy                                     | S41 - S43 |

**General procedures.** Commercially available reagents were reagent grade or better, and were used without further purification. All organic solvents were HPLC grade, and were dried over molecular sieves (3Å or 4Å) prior to their use in fluorescence experiments. NMR solvents were also dried over molecular sieves. Water was deionized with a Treion TSDI column (Treitel Chemical Engineering;  $\rho \geq 50 \text{ k}\Omega \text{ cm}$ ). NMR spectra were processed with TopSpin 3.5 (Bruker Corp.), and plotted with MNova 11.0.4 (Mestrelab Research). Crystal structures were drawn and analyzed using Mercury CSD 3.9,<sup>1</sup> and Platon v. 91117.<sup>2</sup>

**Analysis.** NMR spectra (<sup>1</sup>H, <sup>13</sup>C) were recorded using a Bruker Avance-III 400 MHz spectrometer, equipped with a 5 mm BBFO SmartProbe. All measurements were done at room temperature. <sup>1</sup>H and <sup>13</sup>C NMR chemical shifts are reported in ppm relative to tetramethylsilane. <sup>1</sup>H NMR chemical shifts are referenced to the residual hydrogen signal of the deuterated solvent, and the <sup>13</sup>C NMR chemical shifts are referenced to the <sup>13</sup>C signal(s) of the deuterated solvent. Abbreviations used in the description of NMR data are as follows: Ar, aryl; s, singlet; d, doublet; t, triplet; q, quartet; m, multiplet.

UV-Vis absorbance spectra were measured with a Varian Cary 100 Bio UV-Visible Spectrophotometer, at a scan rate of 600 nm/min. 1- and 10-mm-pathlength quartz cuvettes were used for 1 mM and 5  $\mu\text{M}$  *syn*-(Me,Me)bimane solutions, respectively. Infrared spectra were recorded in the attenuated total reflectance (ATR) mode using a Bruker Vertex 70 FT-IR spectrometer, fitted with a PLATINUM Diamond ATR accessory, at a resolution of 4  $\text{cm}^{-1}$ .

Differential scanning calorimetry (DSC) measurements were carried out using a Mettler Toledo TGA/DSC 1 STAR system, employing a heating rate of 10 °/min, under a flow of dry N<sub>2</sub> (10 ml/min).

Elemental analyses were performed using a ThermoFischer Scientific FlashSmart CHNS Elemental Analyzer. Some analyses were also performed at the Interdepartmental Equipment Facility, Faculty of Agriculture, Food and Environment, The Hebrew University of Jerusalem, as well as at the Scientific Equipment Center, Department of Chemistry, Bar-Ilan University.

Powder X-ray diffraction measurements were conducted at the Department of Chemical Research Support, Weizmann Institute of Science. Diffraction data were

---

<sup>1</sup> C. F. Macrae, I. J. Bruno, J. A. Chisholm, P. R. Edgington, P. McCabe, E. Pidcock, L. Rodriguez-Monge, R. Taylor, J. van de Streek and P. A. Wood, *J. Appl. Cryst.*, 2008, **41**, 466-470.

<sup>2</sup> (a) A. L. Spek, *J. Appl. Cryst.* 2003, **36**, 7-13. (b) A. L. Spek, *Acta Cryst.* 2009, **D65**, 148-155.

collected at room temperature using a Rigaku ULTIMA III (2kW) theta-theta vertical diffractometer with a sealed Cu-anode tube (line source).

Crystal structures from the Cambridge Structural Database (CSD; v. 5.38, May 2017),<sup>3</sup> were retrieved by using ConQuest v. 1.19.<sup>4</sup>

**Fluorescence measurements.** Fluorescence spectra were recorded on a Varian Cary Eclipse Fluorescence Spectrophotometer, using a 2.5-nm excitation slit width, a 5-nm emission slit width, and a 120 nm/min scan rate.

For experiments involving 1 mM solutions of *syn*-(Me,Me)bimane, samples were placed in a 0.1-mm-pathlength absorbance quartz cuvette, which was tilted at 60° relative to the incident excitation beam (front-face illumination),<sup>5</sup> by using a specially-built cuvette holder. This setup was designed to keep the total absorbance at the excitation wavelengths below 0.1, so as to minimize inner filter effects in the relatively concentrated 1 mM solutions, while also minimizing interference from the scattered excitation light. The same setup was used for solid samples, after suspending them in mineral oil prior to measurement.

For experiments involving 5 μM solutions of *syn*-(Me,Me)bimane, a standard 10-mm fluorescence cuvette was used, employing a normal 90° illumination mode.

The observed changes in bimane emission intensity upon addition of NaBPh<sub>4</sub> were also accompanied by changes in bimane absorbance. All fluorescence spectra were corrected for these absorbance variations by dividing the experimental emission intensity by  $1 - 10^{-A_{\text{ex}}}$ , where  $A_{\text{ex}}$  is the absorbance of *syn*-(Me,Me)bimane at the excitation wavelength.<sup>6</sup> When 1 mM bimane solutions were employed, the added NaBPh<sub>4</sub> did not contribute significantly to the overall absorbance at the excitation wavelength. However, when the concentration of bimane was lowered to 5 μM, the relative absorbance of NaBPh<sub>4</sub> at the excitation wavelength could no longer be neglected. Therefore,  $A_{\text{ex}}$  was calculated by subtracting the corresponding absorbance of NaBPh<sub>4</sub> from the total absorbance of the bimane/NaBPh<sub>4</sub> mixture.

**Quantitative NMR measurements.** Each of the sodium-bimane complexes was subjected to quantitative <sup>1</sup>H NMR spectroscopy, in order to assess the composition

---

<sup>3</sup> F. H. Allen, *Acta Crystallogr., Sect. B: Struct. Sci.*, 2002, **58**, 380-388.

<sup>4</sup> I. J. Bruno, J. C. Cole, P. R. Edgington, M. Kessler, C. F. Macrae, P. McCabe, J. Pearson and R. Taylor, *Acta Crystallogr., Sect. B: Struct. Sci.*, 2002, **58**, 389-397.

<sup>5</sup> J. R. Lakowicz, *Principles of Fluorescence Spectroscopy*, Springer, New York, 3<sup>rd</sup> edn., 2006, Ch. 2, pp. 27-61.

<sup>6</sup> S. W. Bigger, K. P. Ghiggino, G. A. Meilak and B. Verity, *J. Chem. Educ.*, 1992, **69**, 675-677.

and purity of bulk samples of these complexes. Each sample typically comprised 2-5 mg of crystals, dissolved in CD<sub>3</sub>CN. Dimethyl sulfone (SO<sub>2</sub>Me<sub>2</sub>) was employed as the integration standard, and the measurements were carried out using a long 30-sec delay time between consecutive scans.

**Solvent for routine NMR measurements.** In order to observe the effects of bimane coordination to Na<sup>+</sup>, a relatively nonpolar NMR solvent was required, such as CDCl<sub>3</sub>. To ensure acceptable signal-to-noise ratios during routine NMR measurements, bimane concentration was set at 8 mM. In CDCl<sub>3</sub>, this often resulted in spontaneous crystallization of the sodium-bimane complexes during measurement. To prevent this, without substantially affecting solvent polarity, we used a mixture of 20% (v/v) 1,2-dichloroethane (C<sub>2</sub>H<sub>4</sub>Cl<sub>2</sub>) in CDCl<sub>3</sub>.

**Synthesis of *syn*-(Me,Me)bimane (1).** *syn*-(Me,Me)bimane was synthesized using a literature procedure.<sup>7</sup> Room-temperature NMR data are given below for this compound in 20% C<sub>2</sub>H<sub>4</sub>Cl<sub>2</sub>/CDCl<sub>3</sub>. The <sup>1</sup>H and <sup>13</sup>C NMR signals are assigned to atomic positions in the bimane scaffold that are enumerated relative to the carbonyl groups, as represented in Figure S1.

<sup>1</sup>H NMR (400 MHz, 20% C<sub>2</sub>H<sub>4</sub>Cl<sub>2</sub>/CDCl<sub>3</sub>, 8 mM): 2.26 (m, 6H, CH<sub>3</sub>, γ), 1.80 (m, 6H, CH<sub>3</sub>, β'). <sup>13</sup>C{<sup>1</sup>H} NMR (101 MHz, 20% C<sub>2</sub>H<sub>4</sub>Cl<sub>2</sub>/CDCl<sub>3</sub>, 8 mM): 160.86 (s, C=O), 145.92 (s, C=C, β), 112.64 (s, C=C, α), 11.86 (s, CH<sub>3</sub>, γ), 6.77 (s, CH<sub>3</sub>, β'). The <sup>13</sup>C{<sup>1</sup>H} NMR data were obtained from a DEPTQ experiment. Assignment of the <sup>1</sup>H and <sup>13</sup>C{<sup>1</sup>H} NMR signals was confirmed by an HMBC experiment. See Figures S2 and S3 for the experimental NMR spectra.

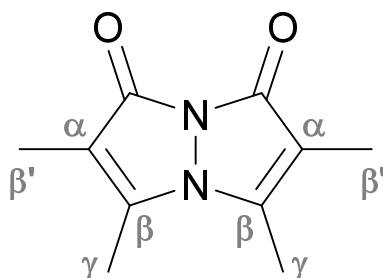

**Figure S1.** Structure of *syn*-(Me,Me)bimane, showing the enumeration of atomic positions relative to the carbonyl groups.

<sup>7</sup> E. M. Kosower and B. Pazhenchevsky, *J. Am. Chem. Soc.*, 1980, **102**, 4983-4993.

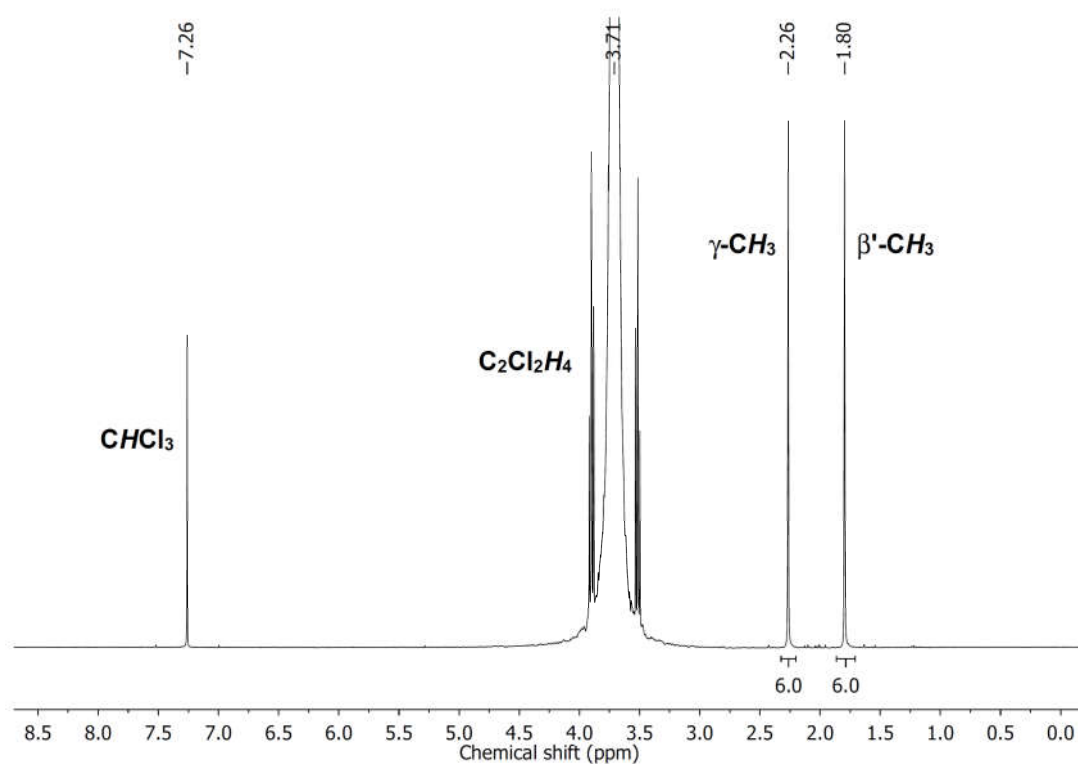

**Figure S2.**  $^1\text{H}$  NMR spectrum of 8 mM *syn*-(Me,Me)bimane in 20%  $\text{C}_2\text{H}_4\text{Cl}_2/\text{CDCl}_3$ .

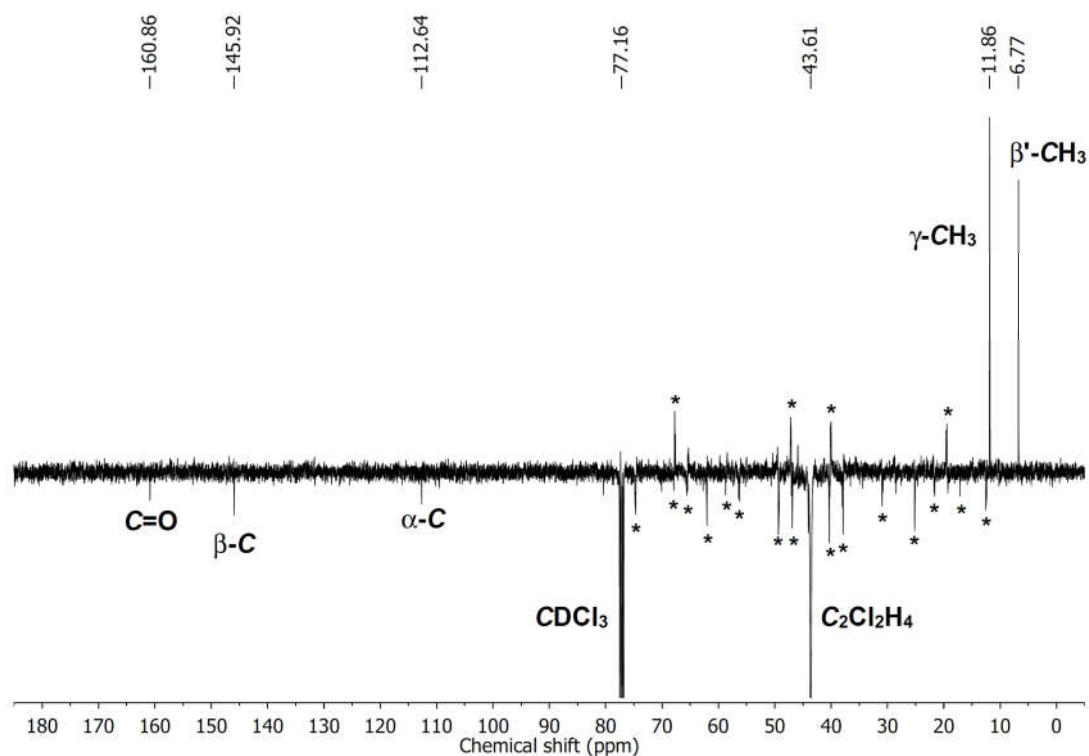

**Figure S3.**  $^{13}\text{C}\{^1\text{H}\}$  DEPTQ NMR spectrum of 8 mM *syn*-(Me,Me)bimane in 20%  $\text{C}_2\text{H}_4\text{Cl}_2/\text{CDCl}_3$ . Signals marked with asterisks (\*) are artifacts caused by the intense peak of  $\text{C}_2\text{H}_4\text{Cl}_2$ .

**Synthesis of complex 2, [Na<sub>2</sub>(bimane)<sub>6</sub>](BPh<sub>4</sub>)<sub>2</sub>.** 280 mg (1.46 mmol) of *syn*-(Me,Me)bimane were dissolved in 70 ml of dry THF, and then 166 mg (0.485 mmol) of solid NaBPh<sub>4</sub> were added to the solution, with stirring. The resulting solution, which immediately changed from colorless to yellow, was stirred at room temperature for 10 min. The solvent was then evaporated under reduced pressure, until the solution reached about a third of its original volume. The product was crystallized at room temperature by allowing diethyl ether vapors to slowly diffuse into the concentrated THF solution, affording yellow feather-like crystals within a few days. The crystals were then separated from the mother-liqueur, washed three times with hexane/CHCl<sub>3</sub> (40:60, v/v), twice with diethyl ether, and placed under vacuum to remove residual solvent. This gave 415 mg (0.215 mmol; 89% yield)<sup>8</sup> of the product, complex 2.

The <sup>1</sup>H and <sup>13</sup>C NMR signals are assigned to atomic positions in the bimane scaffold that are enumerated relative to the carbonyl groups (Figure S1).

<sup>1</sup>H NMR (400 MHz, 20% C<sub>2</sub>H<sub>4</sub>Cl<sub>2</sub>/CDCl<sub>3</sub>, 1.3 mM): 7.33 (m, 16H, B(C<sub>6</sub>H<sub>5</sub>)<sub>4</sub><sup>-</sup>, *ortho*), 6.92 (t, <sup>3</sup>J<sub>HH</sub> = 7.4 Hz, 16H, B(C<sub>6</sub>H<sub>5</sub>)<sub>4</sub><sup>-</sup>, *meta*), 6.76 (m, <sup>3</sup>J<sub>HH</sub> = 7.2 Hz, 8H, B(C<sub>6</sub>H<sub>5</sub>)<sub>4</sub><sup>-</sup>, *para*), 2.11 (m, 36H, CH<sub>3</sub>, γ), 1.75 (m, 36H, CH<sub>3</sub>, β'). <sup>13</sup>C{<sup>1</sup>H} NMR (101 MHz, 20% C<sub>2</sub>H<sub>4</sub>Cl<sub>2</sub>/CDCl<sub>3</sub>, 1.3 mM): 164.17 (m, B-C<sub>Ar</sub>), 162.12 (s, C=O), 147.87 (s, C=C, β), 135.98 (s, C<sub>Ar</sub>-H, *ortho*), 125.53 (m, C<sub>Ar</sub>-H, *meta*), 121.65 (s, C<sub>Ar</sub>-H, *para*), 112.38 (s, C=C, α), 11.79 (s, CH<sub>3</sub>, γ), 6.54 (s, CH<sub>3</sub>, β'). The <sup>13</sup>C{<sup>1</sup>H} NMR data were obtained from a DEPTQ experiment. Assignment of the <sup>1</sup>H and <sup>13</sup>C{<sup>1</sup>H} NMR signals was confirmed by an HMBC experiment. See Figures S4 and S5 for the experimental NMR spectra.

Anal. calcd for C<sub>108</sub>H<sub>112</sub>B<sub>2</sub>N<sub>12</sub>Na<sub>2</sub>O<sub>12</sub>: C, 70.59%; H, 6.14%; N, 9.15%. Found: C, 70.75%; H, 6.24%; N, 9.24%.

Melting point: 186 °C

---

<sup>8</sup> Based on qNMR data, the purity of the product was 95%. The molar and percent yields were calculated assuming this level of purity.

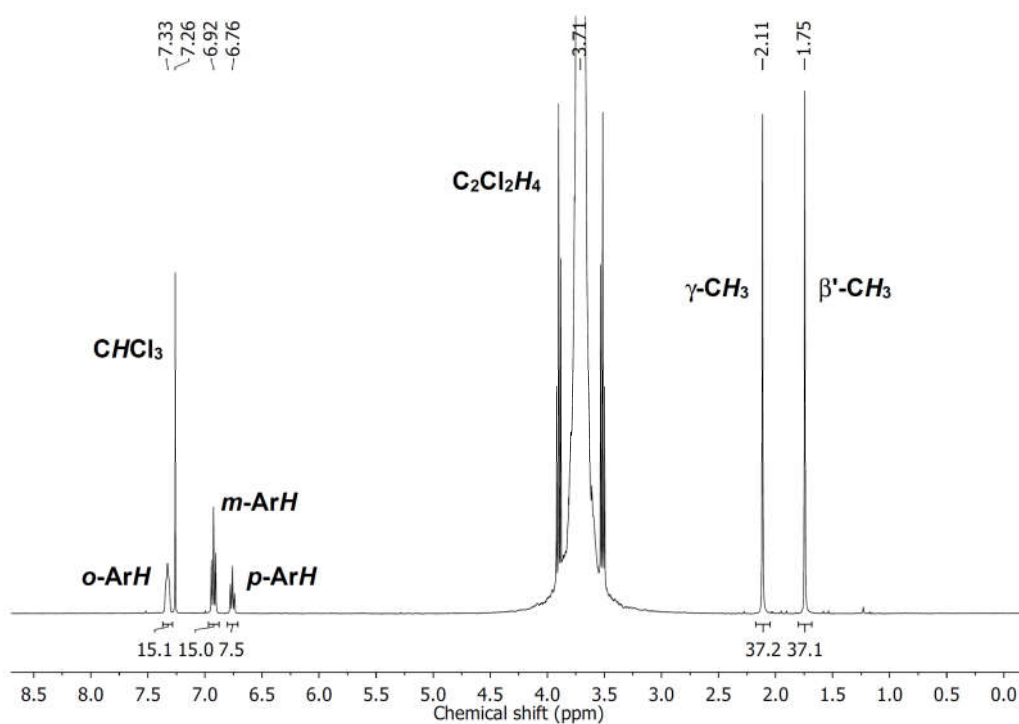

**Figure S4.**  $^1\text{H}$  NMR spectrum of 1.3 mM complex **2** in 20%  $\text{C}_2\text{H}_4\text{Cl}_2/\text{CDCl}_3$ .

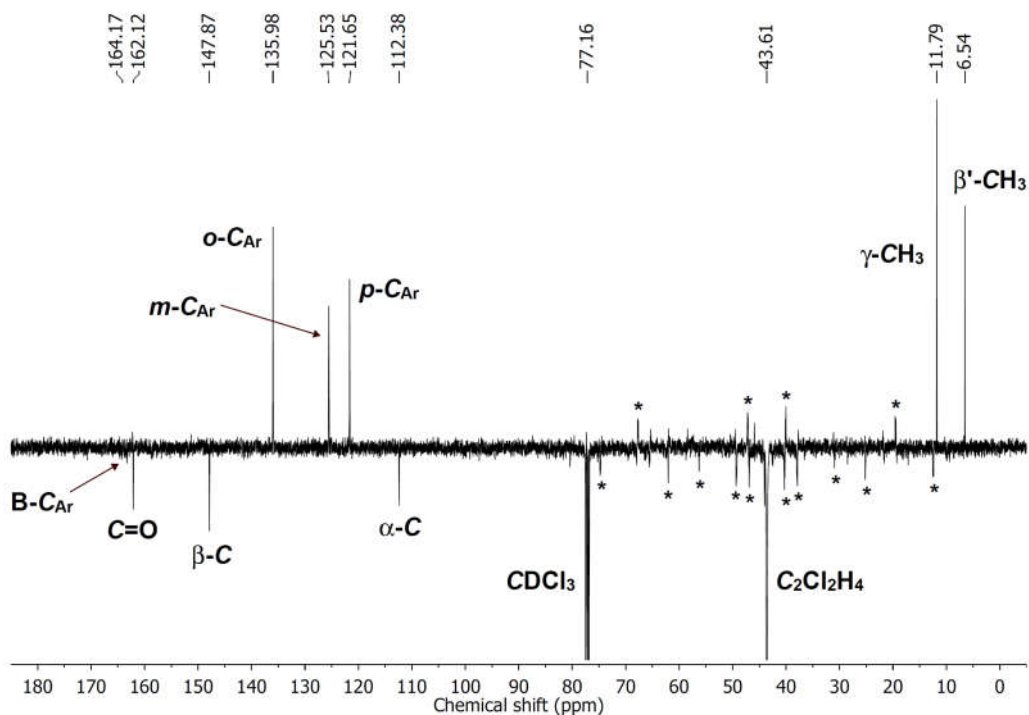

**Figure S5.**  $^{13}\text{C}\{^1\text{H}\}$  DEPTQ NMR spectrum of 1.3 mM complex **2** in 20%  $\text{C}_2\text{H}_4\text{Cl}_2/\text{CDCl}_3$ . The resonance for  $\text{B-C}_{\text{Ar}}$  at 164.17 ppm was located and assigned on the basis of a  $^{13}\text{C}-^1\text{H}$  HMBC experiment. Signals marked with asterisks (\*) are artifacts caused by the intense peak of  $\text{C}_2\text{H}_4\text{Cl}_2$ .



**Synthesis of complex 3, [Na<sub>2</sub>(bimane)<sub>4</sub>(CH<sub>3</sub>CN)<sub>2</sub>](BPh<sub>4</sub>)<sub>2</sub>·xCH<sub>3</sub>CN.** 70.9 mg (0.369 mmol) of *syn*-(Me,Me)bimane were dissolved in 12 ml of dry acetonitrile, and then 63.1 mg (0.184 mmol) of solid NaBPh<sub>4</sub> were added to the solution, with stirring. The resulting solution, which immediately changed from colorless to light yellow, was stirred at room temperature for 10 min. The solvent was then evaporated under reduced pressure, until the solution reached about a third of its original volume. The product was crystallized at room temperature by allowing diethyl ether vapors to slowly diffuse into the concentrated acetonitrile solution, affording yellowish-green needle-like crystals within a few days. The crystals were then separated from the mother-liqueur, washed once with hexane/CHCl<sub>3</sub> (40:60, v/v), twice with diethyl ether, and air-dried. This gave 136 mg (0.0833 mmol; 90% yield)<sup>9</sup> of the product, complex **3**.

The <sup>1</sup>H and <sup>13</sup>C NMR signals are assigned to atomic positions in the bimane scaffold that are enumerated relative to the carbonyl groups (Figure S1).

<sup>1</sup>H NMR (400 MHz, 20% C<sub>2</sub>H<sub>4</sub>Cl<sub>2</sub>/CDCl<sub>3</sub>, 2 mM): 7.36 (m, 16H, B(C<sub>6</sub>H<sub>5</sub>)<sub>4</sub><sup>-</sup>, *ortho*), 6.94 (t, <sup>3</sup>J<sub>HH</sub> = 7.4 Hz, 16H, B(C<sub>6</sub>H<sub>5</sub>)<sub>4</sub><sup>-</sup>, *meta*), 6.76 (m, <sup>3</sup>J<sub>HH</sub> = 7.2 Hz, 8H, B(C<sub>6</sub>H<sub>5</sub>)<sub>4</sub><sup>-</sup>, *para*), 2.03 (m, 24H, CH<sub>3</sub>, γ), 1.96 (s, 9H, CH<sub>3</sub>CN),<sup>10</sup> 1.71 (m, 24H, CH<sub>3</sub>, β').

<sup>13</sup>C {<sup>1</sup>H} NMR (101 MHz, 20% C<sub>2</sub>H<sub>4</sub>Cl<sub>2</sub>/CDCl<sub>3</sub>, 2 mM): 164.02 (q, <sup>1</sup>J<sub>BC</sub> = 49.2 Hz, B-C<sub>Ar</sub>), 162.76 (s, C=O), 148.98 (s, C=C, β), 135.85 (s, C<sub>Ar</sub>-H, *ortho*), 125.72 (m, C<sub>Ar</sub>-H, *meta*), 121.75 (s, C<sub>Ar</sub>-H, *para*), 116.39 (s, CH<sub>3</sub>CN), 112.23 (s, C=C, α), 11.76 (s, CH<sub>3</sub>, γ), 6.41 (s, CH<sub>3</sub>, β'), 1.85 (s, CH<sub>3</sub>CN). The <sup>13</sup>C {<sup>1</sup>H} NMR data were obtained from a DEPTQ experiment. Assignment of the <sup>1</sup>H and <sup>13</sup>C {<sup>1</sup>H} NMR signals was confirmed by an HMBC experiment. See Figures S6 and S7 for the experimental NMR spectra.

Satisfactory elemental analyses could not be obtained for this complex, due to facile loss of the co-crystallized acetonitrile.

Melting point: 218 °C (decomp)

<sup>9</sup> Due to facile loss of the co-crystallized interstitial acetonitrile, bulk samples of complex **3** differed in their CH<sub>3</sub>CN content. qNMR data for these samples showed the bimane-to-CH<sub>3</sub>CN molar ratio to typically vary between 1:1 and 2:1, whereas the bimane-to-BPh<sub>4</sub><sup>-</sup> molar ratio was consistently 2:1, as expected. The molar and percent yields reported here were calculated assuming a purity of 94%, as estimated by qNMR. The calculation was based on the detected amounts of bimane and BPh<sub>4</sub><sup>-</sup>, and a molecular composition excluding interstitial CH<sub>3</sub>CN, i.e., [Na<sub>2</sub>(bimane)<sub>4</sub>(CH<sub>3</sub>CN)<sub>2</sub>](BPh<sub>4</sub>)<sub>2</sub>.

<sup>10</sup> On the basis of the crystallographic data for complex **3**, the bimane and CH<sub>3</sub>CN are expected to be in equimolar amounts. Therefore, the ratio of integrals for their respective <sup>1</sup>H NMR signals should be 4:1 (12H per bimane molecule, 3H per acetonitrile molecule). However, the observed amount of CH<sub>3</sub>CN is ~25% lower than expected due to facile loss of this volatile component.

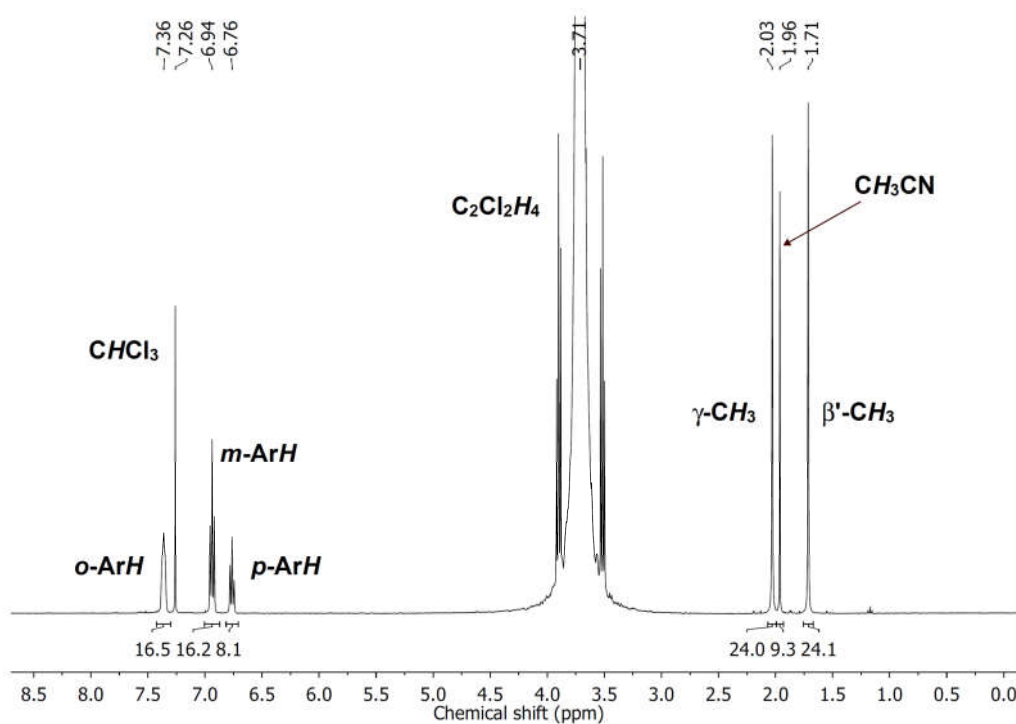

**Figure S6.**  $^1\text{H}$  NMR spectrum of 2 mM complex **3** in 20%  $\text{C}_2\text{H}_4\text{Cl}_2/\text{CDCl}_3$ . Note that the integral for the  $\text{CH}_3\text{CN}$  peak is therefore 9.3, instead of the expected 12.0, reflecting the tendency of this complex to lose acetonitrile in the solid state.

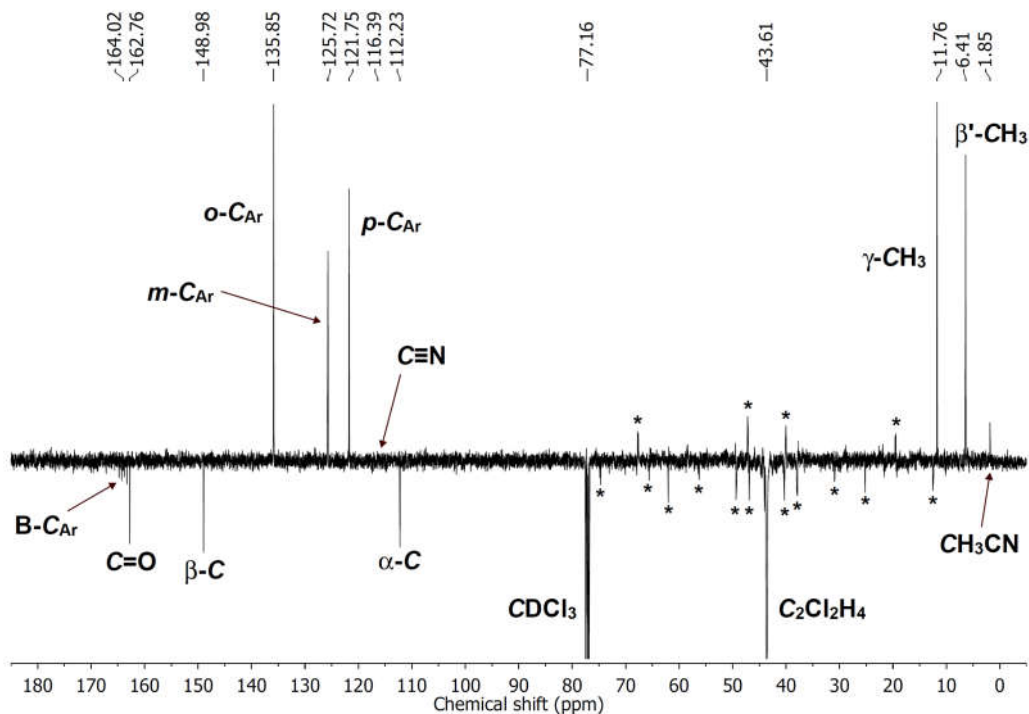

**Figure S7.**  $^{13}\text{C}\{^1\text{H}\}$  DEPTQ NMR spectrum of 2 mM complex **3** in 20%  $\text{C}_2\text{H}_4\text{Cl}_2/\text{CDCl}_3$ . The  $\text{C}\equiv\text{N}$  resonance at 116.39 ppm was located and assigned on the basis of a  $^{13}\text{C}-^1\text{H}$  HMBC experiment. Signals marked with asterisks (\*) are artifacts caused by the intense peak of  $\text{C}_2\text{H}_4\text{Cl}_2$ .

**Synthesis of complex 4, [Na(bimane)<sub>2</sub>]BPh<sub>4</sub>.** 300 mg (0.185 mmol) of complex **3** were dissolved in 120 ml of dry chloroform. The product was crystallized at room temperature by allowing diethyl ether vapors to slowly diffuse into the chloroform solution, affording greenish-yellow block-shaped crystals within a few days. The crystals were then separated from the mother-liqueur, washed three times with CHCl<sub>3</sub>, twice with diethyl ether, and placed under vacuum to remove residual solvent. This gave 144 mg (0.192 mmol; 52% yield)<sup>11</sup> of the product, complex **4**.

The <sup>1</sup>H and <sup>13</sup>C NMR signals are assigned to atomic positions in the bimane scaffold that are enumerated relative to the carbonyl groups (Figure S1).

<sup>1</sup>H NMR (400 MHz, 20% C<sub>2</sub>H<sub>4</sub>Cl<sub>2</sub>/CDCl<sub>3</sub>, 4 mM): 7.40 (m, 8H, B(C<sub>6</sub>H<sub>5</sub>)<sub>4</sub><sup>-</sup>, *ortho*), 6.96 (t, <sup>3</sup>J<sub>HH</sub> = 7.4 Hz, 8H, B(C<sub>6</sub>H<sub>5</sub>)<sub>4</sub><sup>-</sup>, *meta*), 6.78 (m, <sup>3</sup>J<sub>HH</sub> = 7.2 Hz, 4H, B(C<sub>6</sub>H<sub>5</sub>)<sub>4</sub><sup>-</sup>, *para*), 2.08 (m, 12H, CH<sub>3</sub>, γ), 1.73 (m, 12H, CH<sub>3</sub>, β'). <sup>13</sup>C{<sup>1</sup>H} NMR (101 MHz, 20% C<sub>2</sub>H<sub>4</sub>Cl<sub>2</sub>/CDCl<sub>3</sub>, 4 mM): 163.82 (m, B-C<sub>Ar</sub>), 162.61 (s, C=O), 148.72 (s, C=C, β), 135.76 (s, C<sub>Ar</sub>-H, *ortho*), 125.83 (m, C<sub>Ar</sub>-H, *meta*), 121.83 (s, C<sub>Ar</sub>-H, *para*), 112.33 (s, C=C, α), 11.79 (s, CH<sub>3</sub>, γ), 6.44 (s, CH<sub>3</sub>, β'). The <sup>13</sup>C{<sup>1</sup>H} NMR data were obtained from a DEPTQ experiment. Assignment of the <sup>1</sup>H and <sup>13</sup>C{<sup>1</sup>H} NMR signals was confirmed by an HMBC experiment. See Figures S8 and S9 for the experimental NMR spectra.

Anal. calcd for C<sub>44</sub>H<sub>44</sub>BN<sub>4</sub>NaO<sub>4</sub>: C, 72.73%; H, 6.10%; N, 7.71%. Found: C, 71.82%; H, 6.01%; N, 7.57%.

Melting point: 215 °C

---

<sup>11</sup> Based on qNMR data, the purity of the product was 97%. The molar and percent yields were calculated assuming this level of purity.

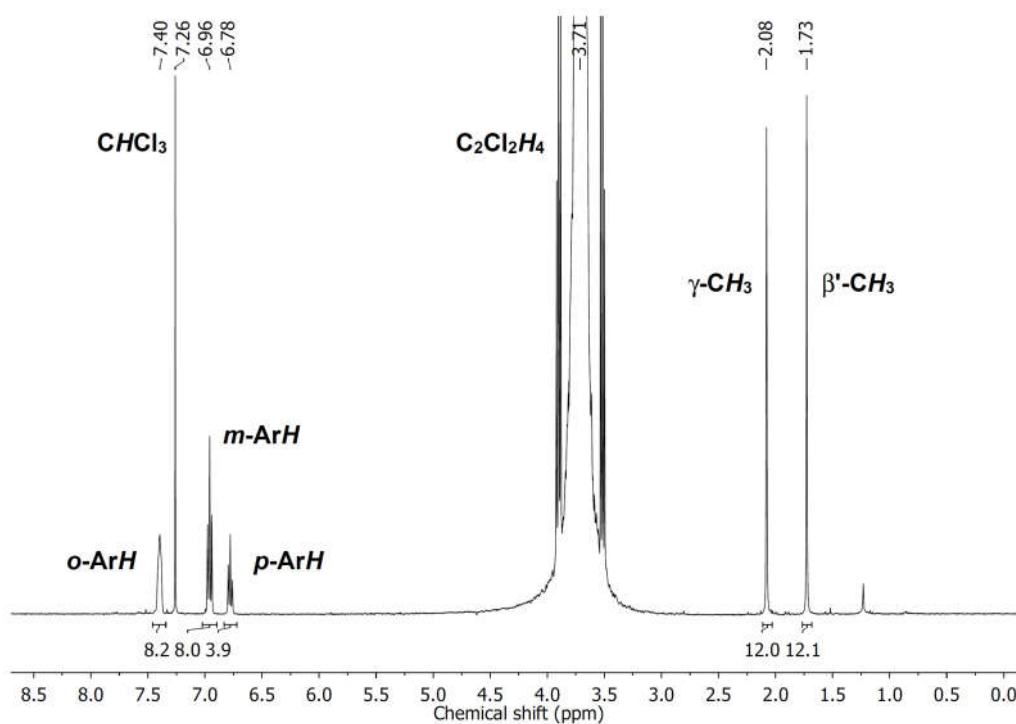

**Figure S8.**  $^1\text{H}$  NMR spectrum of 4 mM complex 4 in 20%  $\text{C}_2\text{H}_4\text{Cl}_2/\text{CDCl}_3$ .

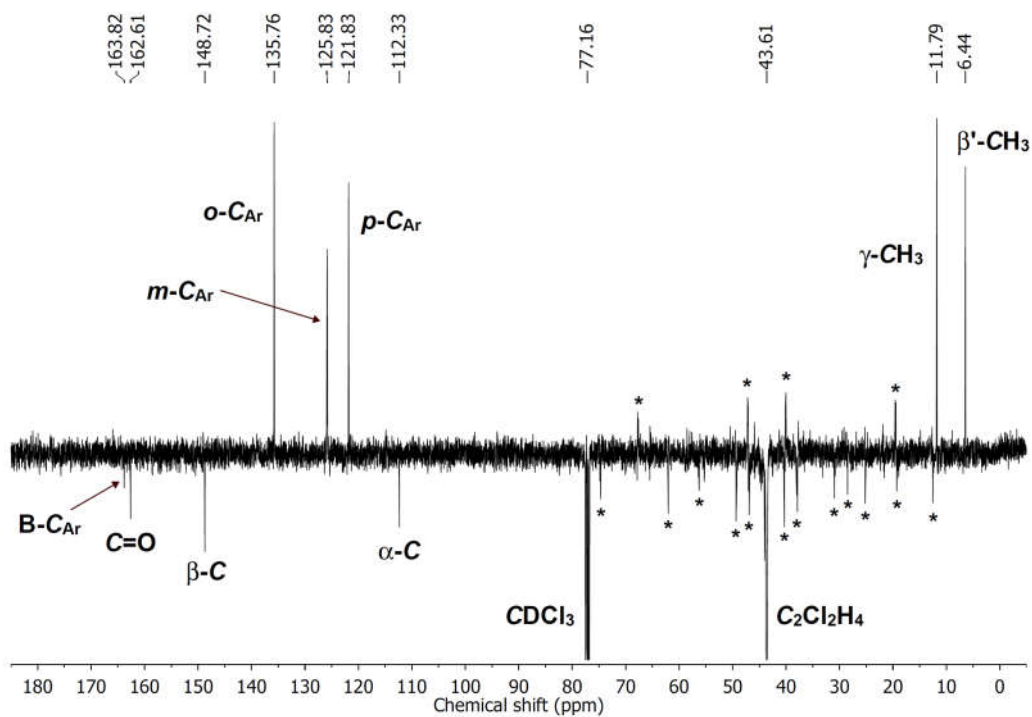

**Figure S9.**  $^{13}\text{C}\{^1\text{H}\}$  DEPTQ NMR spectrum of 4 mM complex 4 in 20%  $\text{C}_2\text{H}_4\text{Cl}_2/\text{CDCl}_3$ . Signals marked with asterisks (\*) are artifacts caused by the intense peak of  $\text{C}_2\text{H}_4\text{Cl}_2$ .

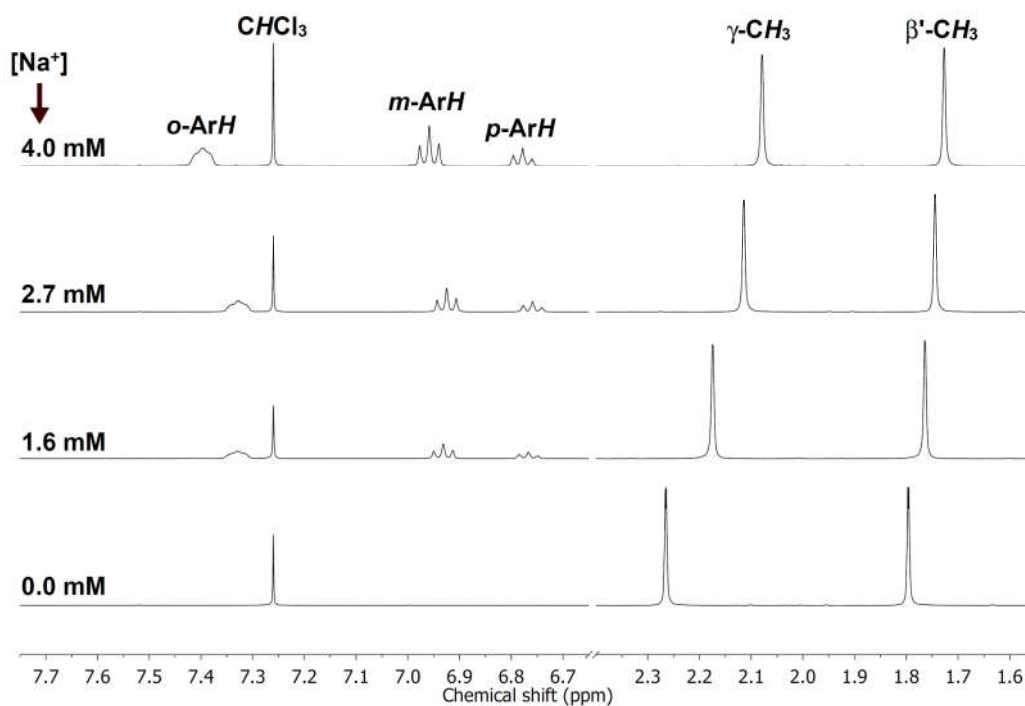

**Figure S10.**  $^1\text{H}$  NMR spectra of 8 mM *syn*-(Me,Me)bimane in 20%  $\text{C}_2\text{H}_4\text{Cl}_2/\text{CDCl}_3$ , with increasing concentrations of  $\text{NaBPh}_4$ . The spectral region of 2.4-6.7 ppm, containing the strong dichloroethane resonance, was truncated for clarity.

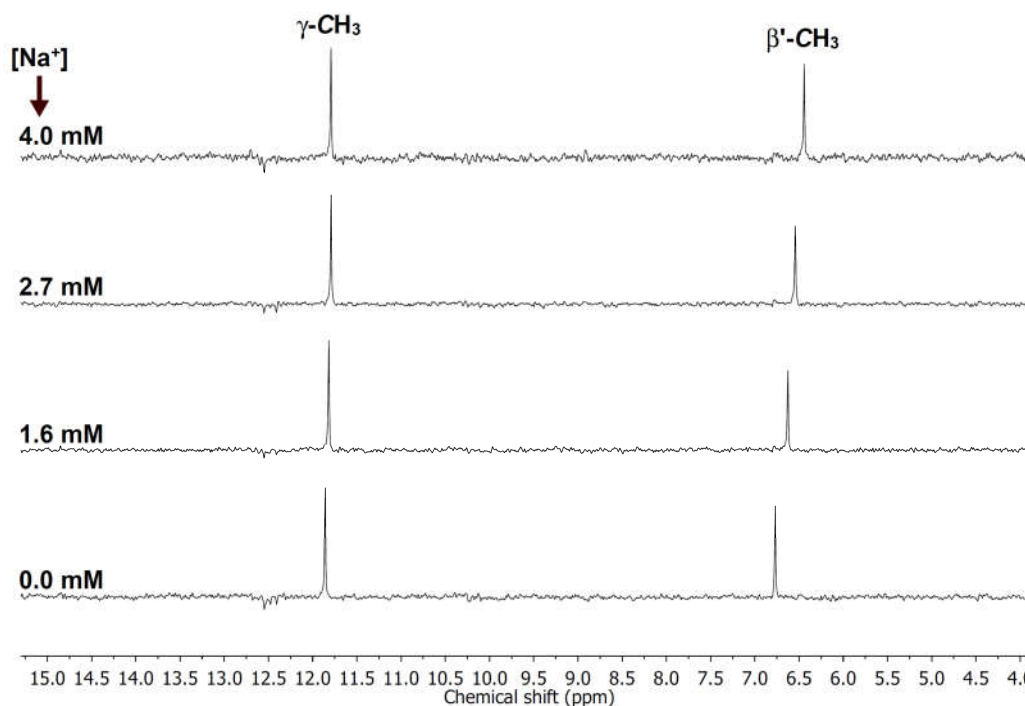

**Figure S11.**  $^{13}\text{C}\{^1\text{H}\}$  DEPTQ NMR spectra of 8 mM *syn*-(Me,Me)bimane in 20%  $\text{C}_2\text{H}_4\text{Cl}_2/\text{CDCl}_3$ , with increasing concentrations of  $\text{NaBPh}_4$ . Only the highfield region containing the bimane methyl resonances is shown (see Figure S12 for the lowfield region).

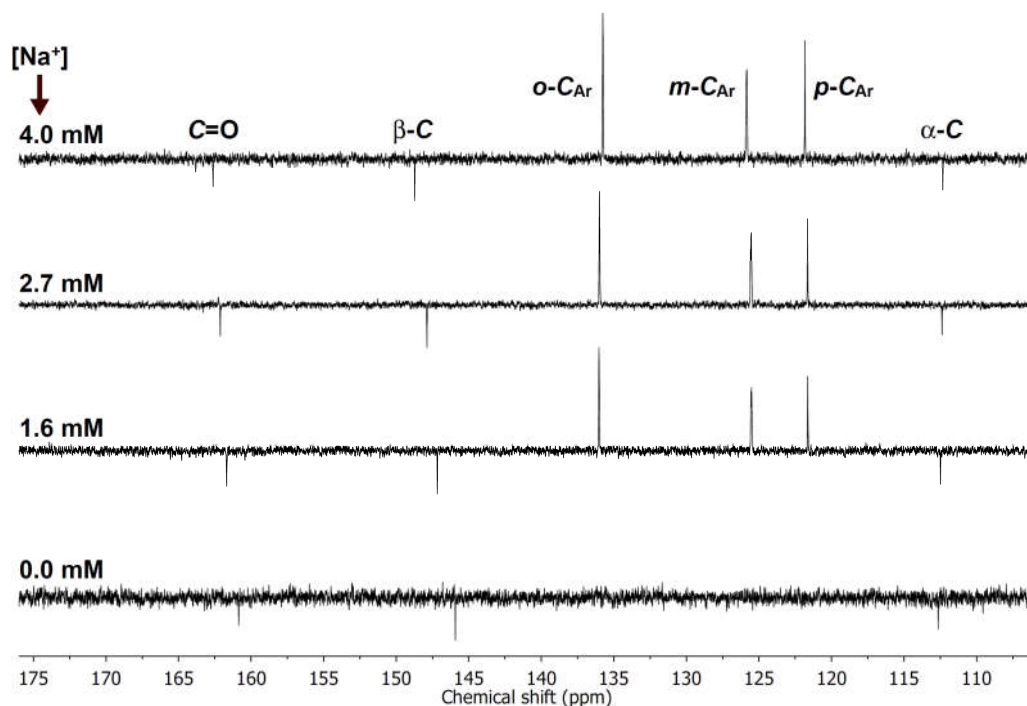

**Figure S12.**  $^{13}\text{C}\{^1\text{H}\}$  DEPTQ NMR spectra of 8 mM *syn*-(Me,Me)bimane in 20%  $\text{C}_2\text{H}_4\text{Cl}_2/\text{CDCl}_3$ , with increasing concentrations of  $\text{NaBPh}_4$ . Only the lowfield region containing the bimane carbonyl and olefinic resonances, as well as the tetraphenylborate aromatic signals, is shown (see Figure S11 for the highfield region).

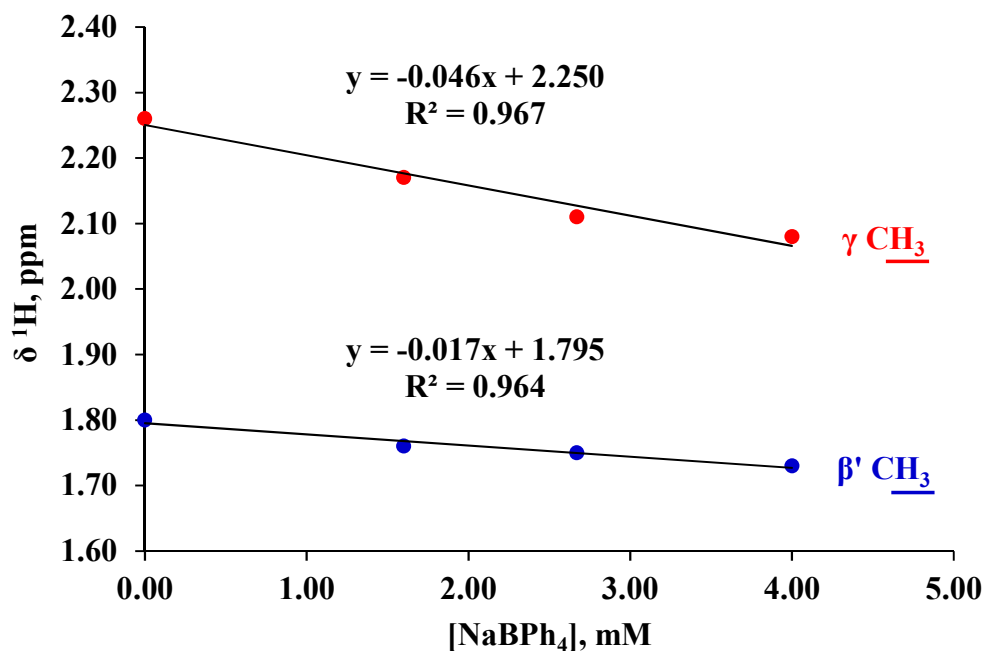

**Figure S13.**  $^1\text{H}$  NMR chemical shifts of 8 mM *syn*-(Me,Me)bimane in 20%  $\text{C}_2\text{H}_4\text{Cl}_2/\text{CDCl}_3$  as a function of  $\text{NaBPh}_4$  concentration.

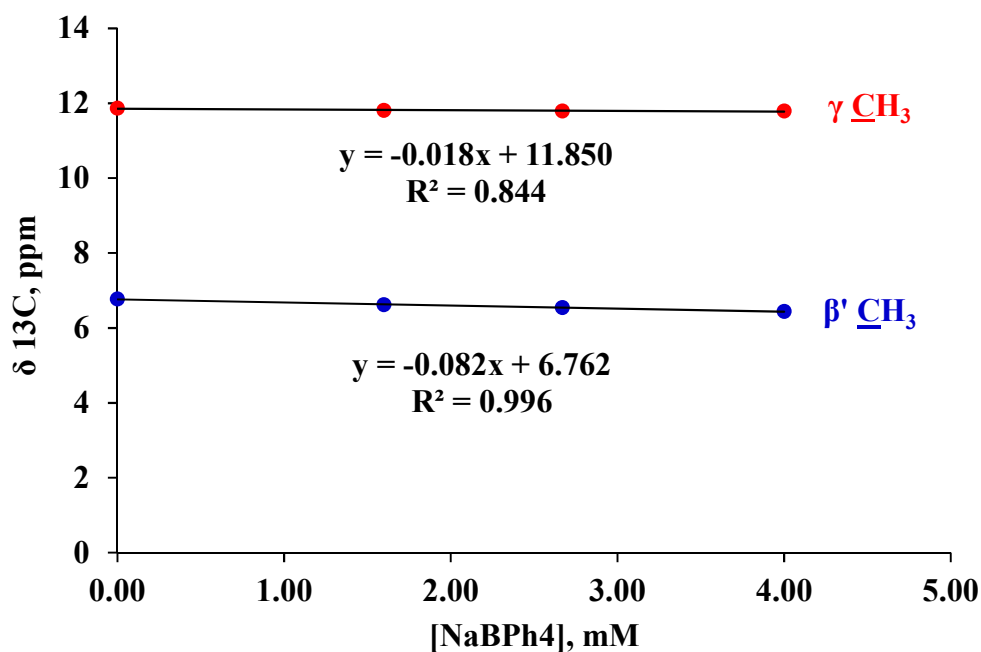

**Figure S14.**  $^{13}\text{C}$  NMR chemical shifts of the methyl resonances of 8 mM *syn*-(Me,Me)bimane in 20%  $\text{C}_2\text{H}_4\text{Cl}_2/\text{CDCl}_3$  as a function of  $\text{NaBPh}_4$  concentration.

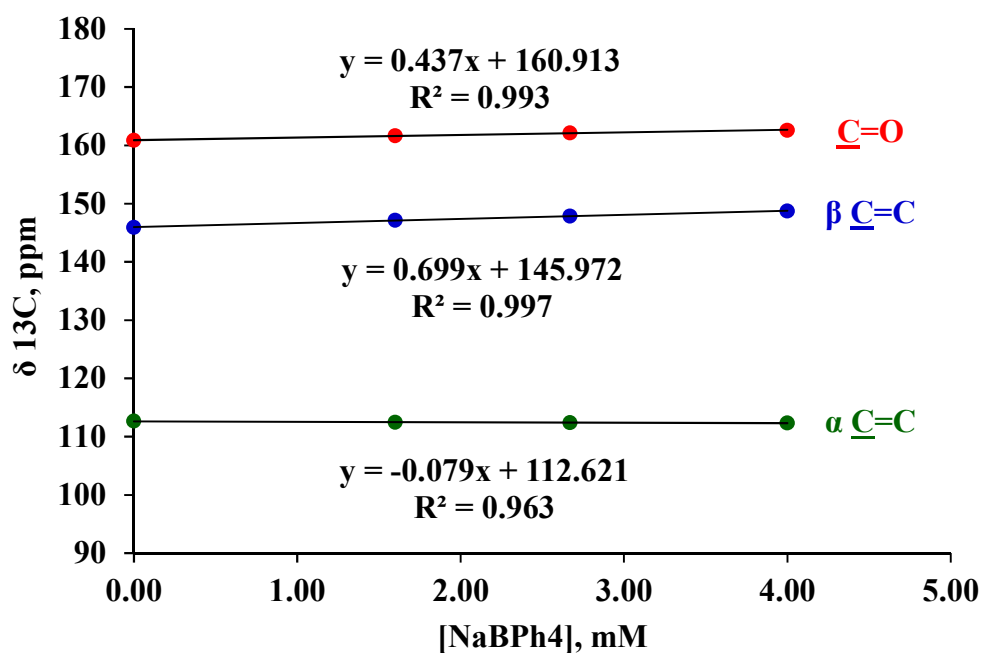

**Figure S15.**  $^{13}\text{C}$  NMR chemical shifts of the endocyclic resonances of 8 mM *syn*-(Me,Me)bimane in 20%  $\text{C}_2\text{H}_4\text{Cl}_2/\text{CDCl}_3$  as a function of  $\text{NaBPh}_4$  concentration.

**Crystal structure determination.** Single-crystal X-ray diffraction experiments were carried out at the Department of Chemical Research Support, Weizmann Institute of Science. Crystallographic data were collected at 100 K on a dual source Rigaku XtaLab PRO diffractometer equipped with a PILATUS 200 detector, with radiation at

$\lambda(\text{Cu K}\alpha) = 1.54184 \text{ \AA}$ . Data were processed with CrysAlis<sup>PRO</sup>.<sup>12</sup> Structures were solved with SHELXT,<sup>13</sup> and refined using SHELXL,<sup>14</sup> with full matrix least-squares based on  $F^2$ . Hydrogen atoms were calculated in a riding mode. All crystallographic data were deposited in the CSD.

**X-ray crystallographic analysis of *syn*-(Me,Me)bimane.** The room-temperature crystal structure of *syn*-(Me,Me)bimane was reported previously.<sup>15</sup> Herein, we provide crystallographic data for this bimane at 100 K. Crystals of *syn*-(Me,Me)bimane suitable for X-ray diffraction were grown from an acetonitrile solution at  $-20 \text{ }^\circ\text{C}$ . The crystal parameters are given in Table S1, and the low-temperature crystal structure of the bimane is shown in Figure S16. The bimane scaffold bond lengths are collected in Table S2. For comparative purposes, this table also contains data for the previously-reported room-temperature structure.

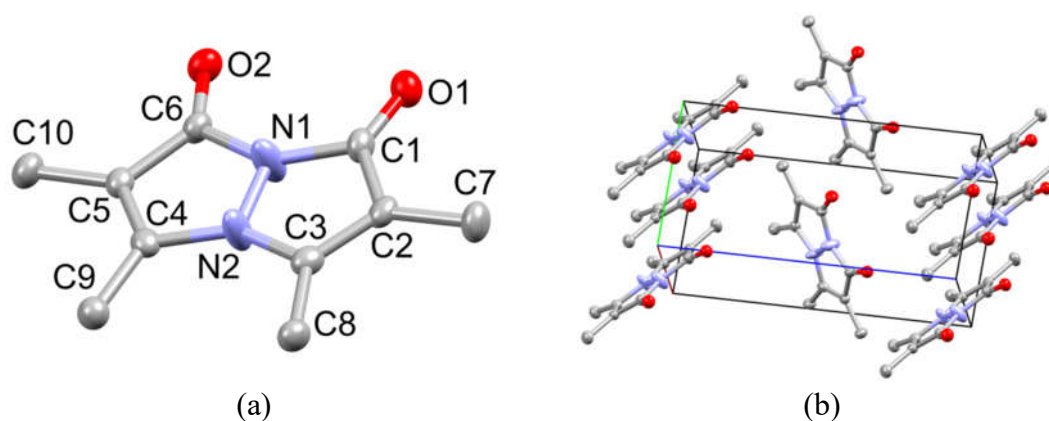

**Figure S16.** Crystal structure of *syn*-(Me,Me)bimane at 100 K (with thermal ellipsoids at the 50% probability level): (a) asymmetric unit; (b) unit cell. Hydrogen atoms were omitted for clarity. Atoms are color-coded as follows: O, red; C, grey; N, light blue.

<sup>12</sup> CrysAlisPRO, Oxford Diffraction / Agilent Technologies UK Ltd, Yarnton, England.

<sup>13</sup> G. M. Sheldrick, *Acta Crystallogr., Sect. A: Fundam. Crystallogr.*, 2015, **71**, 3-8.

<sup>14</sup> G. M. Sheldrick, *Acta Crystallogr., Sect. C: Cryst. Struct. Commun.*, 2015, **71**, 3-8.

<sup>15</sup> J. Bernstein, E. Goldstein and I. Goldberg, *Cryst. Struct. Commun.*, 1980, **9**, 301-305.



**Table S1.** Crystallographic data for *syn*-(Me,Me)bimane (1) and complexes 2-4.

|                                                                                                                     | <i>syn</i> -(Me,Me)bimane (1)                                 | Complex 2                                                                                        | Complex 3                                                                                      | Complex 4 (polymorph A)                                          | Complex 4 (polymorph B)                                          |
|---------------------------------------------------------------------------------------------------------------------|---------------------------------------------------------------|--------------------------------------------------------------------------------------------------|------------------------------------------------------------------------------------------------|------------------------------------------------------------------|------------------------------------------------------------------|
| Formula                                                                                                             | C <sub>10</sub> H <sub>12</sub> N <sub>2</sub> O <sub>2</sub> | C <sub>108</sub> H <sub>112</sub> B <sub>2</sub> N <sub>12</sub> Na <sub>2</sub> O <sub>12</sub> | C <sub>96</sub> H <sub>100</sub> B <sub>2</sub> N <sub>12</sub> Na <sub>2</sub> O <sub>8</sub> | C <sub>44</sub> H <sub>44</sub> BN <sub>4</sub> NaO <sub>4</sub> | C <sub>44</sub> H <sub>44</sub> BN <sub>4</sub> NaO <sub>4</sub> |
| FW, g mol <sup>-1</sup>                                                                                             | 192.22                                                        | 1837.69                                                                                          | 1617.47                                                                                        | 726.63                                                           | 726.63                                                           |
| Crystal appearance                                                                                                  | Colorless plate                                               | Light yellow plate                                                                               | Yellow needle                                                                                  | Light green prism                                                | Yellow block                                                     |
| Crystal dimensions, mm                                                                                              | 0.099 × 0.072 × 0.052                                         | 0.323 × 0.055 × 0.023                                                                            | 0.162 × 0.027 × 0.027                                                                          | 0.199 × 0.077 × 0.069                                            | 0.125 × 0.066 × 0.038                                            |
| Crystal system                                                                                                      | Monoclinic                                                    | Monoclinic                                                                                       | Monoclinic                                                                                     | Monoclinic                                                       | Monoclinic                                                       |
| Space group                                                                                                         | <i>Pn</i>                                                     | <i>P2<sub>1</sub>/n</i>                                                                          | <i>Pc</i>                                                                                      | <i>C2/c</i>                                                      | <i>C2/c</i>                                                      |
| a, Å                                                                                                                | 6.51250(10)                                                   | 15.2728(2)                                                                                       | 14.8036(3)                                                                                     | 17.4802(1)                                                       | 17.4616(3)                                                       |
| b, Å                                                                                                                | 5.97220(10)                                                   | 10.3419(1)                                                                                       | 10.3215(2)                                                                                     | 11.8861(1)                                                       | 11.9083(1)                                                       |
| c, Å                                                                                                                | 12.10290(10)                                                  | 30.0963(3)                                                                                       | 28.7105(6)                                                                                     | 19.0909(2)                                                       | 20.9140(3)                                                       |
| α, °                                                                                                                | 90.0                                                          | 90.0                                                                                             | 90.0                                                                                           | 90.0                                                             | 90.0                                                             |
| β, °                                                                                                                | 95.6560(10)                                                   | 98.513(1)                                                                                        | 91.843(2)                                                                                      | 110.406(1)                                                       | 121.268(2)                                                       |
| γ, °                                                                                                                | 90.0                                                          | 90.0                                                                                             | 90.0                                                                                           | 90.0                                                             | 90.0                                                             |
| Cell volume, Å <sup>3</sup>                                                                                         | 468.438(11)                                                   | 4701.33(9)                                                                                       | 4384.56(15)                                                                                    | 3717.62(6)                                                       | 3717.14(11)                                                      |
| Z                                                                                                                   | 2                                                             | 2                                                                                                | 2                                                                                              | 4                                                                | 4                                                                |
| <i>D</i> (calc), g cm <sup>-3</sup>                                                                                 | 1.363                                                         | 1.298                                                                                            | 1.225                                                                                          | 1.298                                                            | 1.298                                                            |
| μ, mm <sup>-1</sup>                                                                                                 | 0.794                                                         | 0.760                                                                                            | 0.710                                                                                          | 0.761                                                            | 0.761                                                            |
| Temperature, K                                                                                                      | 100(2)                                                        | 100(2)                                                                                           | 100(2)                                                                                         | 100(2)                                                           | 100(2)                                                           |
| Radiation                                                                                                           | Cu Kα (λ = 1.54184 Å)                                         | Cu Kα (λ = 1.54184 Å)                                                                            | Cu Kα (λ = 1.54184 Å)                                                                          | Cu Kα (λ = 1.54184 Å)                                            | Cu Kα (λ = 1.54184 Å)                                            |
| <i>F</i> (000)                                                                                                      | 204                                                           | 1944                                                                                             | 1712                                                                                           | 1536                                                             | 1536                                                             |
| Limiting indices                                                                                                    | -8 ≤ <i>h</i> ≤ 8, -7 ≤ <i>k</i> ≤ 7, -15 ≤ <i>l</i> ≤ 15     | -19 ≤ <i>h</i> ≤ 19, -12 ≤ <i>k</i> ≤ 12, -38 ≤ <i>l</i> ≤ 29                                    | -17 ≤ <i>h</i> ≤ 17, -9 ≤ <i>k</i> ≤ 12, -34 ≤ <i>l</i> ≤ 34                                   | -21 ≤ <i>h</i> ≤ 16, -14 ≤ <i>k</i> ≤ 12, -23 ≤ <i>l</i> ≤ 23    | -19 ≤ <i>h</i> ≤ 21, -11 ≤ <i>k</i> ≤ 14, -26 ≤ <i>l</i> ≤ 14    |
| Reflections (unique)                                                                                                | 8323 (1801)                                                   | 41296 (10062)                                                                                    | 34188 (14697)                                                                                  | 15105 (3532)                                                     | 15961(3795)                                                      |
| Data completeness                                                                                                   | 0.999                                                         | 0.998                                                                                            | 0.997                                                                                          | 1.000                                                            | 1.000                                                            |
| θ <sub>max</sub> , °                                                                                                | 79.9                                                          | 80.2                                                                                             | 66.6                                                                                           | 70.1                                                             | 74.473                                                           |
| <i>R</i> <sub>int</sub>                                                                                             | 0.0267                                                        | 0.0390                                                                                           | 0.0471                                                                                         | 0.0343                                                           | 0.0272                                                           |
| Data/restraints/parameters                                                                                          | 1801 / 2 / 131                                                | 10062 / 0 / 633                                                                                  | 14697 / 2 / 1117                                                                               | 3532 / 0 / 249                                                   | 3795 / 0 / 249                                                   |
| <i>R</i> <sub>1</sub> , <i>wR</i> <sub>2</sub> <sup>**</sup> (all data)                                             | 0.0410, 0.1024                                                | 0.0525, 0.1201                                                                                   | 0.0740, 0.1461                                                                                 | 0.0387, 0.0993                                                   | 0.0401, 0.0989                                                   |
| <i>R</i> <sub>1</sub> , <i>wR</i> <sub>2</sub> <sup>**</sup> [ <i>F</i> <sup>2</sup> > 2σ( <i>F</i> <sup>2</sup> )] | 0.0403, 0.1020                                                | 0.0451, 0.1158                                                                                   | 0.0559, 0.1354                                                                                 | 0.0370, 0.0981                                                   | 0.0374, 0.0970                                                   |
| Goodness-of-fit on <i>F</i> <sup>2</sup> <sup>***</sup>                                                             | 1.090                                                         | 1.048                                                                                            | 1.025                                                                                          | 1.042                                                            | 1.049                                                            |
| Largest peak / hole, e Å <sup>-3</sup>                                                                              | 0.230 / -0.176                                                | 0.358 / -0.286                                                                                   | 0.329 / -0.194                                                                                 | 0.240 / -0.345                                                   | 0.275 / -0.374                                                   |
| Flack parameter                                                                                                     | 0.03(11)                                                      | -                                                                                                | 0.5(2)                                                                                         | -                                                                | -                                                                |
| CCDC number                                                                                                         | 1821932                                                       | 1821936                                                                                          | 1821935                                                                                        | 1821933                                                          | 1821934                                                          |

$$* R_1 = \sum ||F_o| - |F_c|| / \sum |F_o|.$$

$$** wR_2 = [\sum w(F_o^2 - F_c^2)^2 / \sum w(F_o^2)^2]^{1/2}.$$

$$*** \text{ Goodness-of-fit} = S = [\sum w(F_o^2 - F_c^2)^2 / (n - p)]^{1/2}; n = \text{number of reflections}; p = \text{total number of parameters refined}.$$

$$w = 1/[\sigma^2(F_o^2) + (aP)^2 + bP]; P = [2F_c^2 + \max(F_o^2, 0)]/3.$$

**Table S2.** Comparison of bimane scaffold bond lengths (Å) in the crystal structures of *syn*-(Me,Me)bimane at room temperature and 100 K.\*

| Bond |       | Room temperature<br>(previous literature) <sup>15</sup> | 100 K<br>(this work) |
|------|-------|---------------------------------------------------------|----------------------|
| C=O  | C1–O1 | 1.217(4)                                                | 1.211(5)             |
|      | C6–O2 | 1.207(4)                                                | 1.215(5)             |
| OC–C | C1–C2 | 1.448(4)                                                | 1.456(5)             |
|      | C5–C6 | 1.432(4)                                                | 1.450(5)             |
| C=C  | C2–C3 | 1.375(4)                                                | 1.359(5)             |
|      | C4–C5 | 1.361(4)                                                | 1.356(5)             |
| OC–N | C1–N1 | 1.410(4)                                                | 1.403(5)             |
|      | C6–N1 | 1.423(4)                                                | 1.415(5)             |
| CC–N | C3–N2 | 1.361(4)                                                | 1.380(5)             |
|      | C4–N2 | 1.372(4)                                                | 1.394(5)             |
| N–N  | N1–N2 | 1.378(4)                                                | 1.372(3)             |

\* Atom numbering is identical in both structures. Due to the inherent symmetry of the bimane molecule, each bond length in the room-temperature structure can be compared with either of the two corresponding bond lengths in the low-temperature structure.

**X-ray crystallographic analysis of complex 2.** Diffraction-quality crystals of complex **2** were grown at room temperature from a chloroform solution overlaid with diethyl ether. The crystal parameters are listed in Table S1, and the crystal structure of the complex is depicted in Figures S17 and S18. Select bond lengths are given in Tables S3 and S4. For comparative purposes, Table S3 also contains data for the low-temperature structure of *syn*-(Me,Me)bimane.

A crystal of **2** was also isolated from THF/Et<sub>2</sub>O, and identified by its lattice parameters.

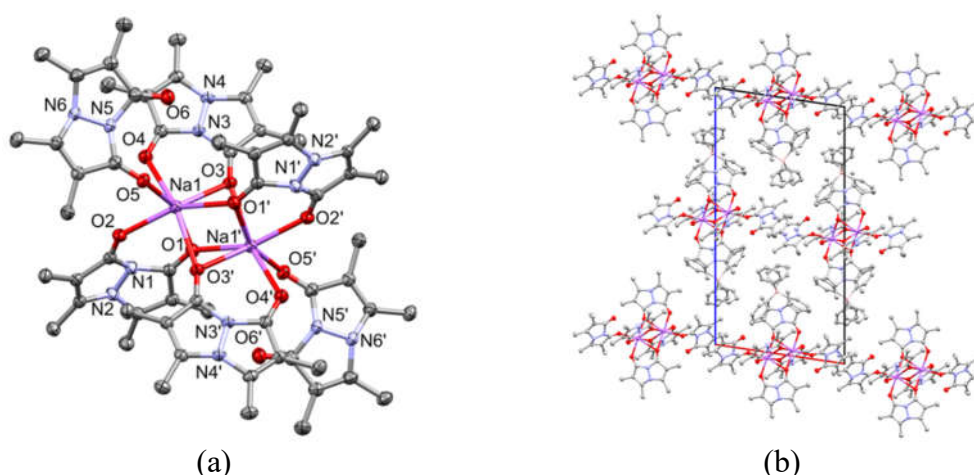

**Figure S17.** Crystal structure of complex **2** (with thermal ellipsoids at the 50% probability level): (a) dicationic fragment; (b) unit cell, viewed along the *b* axis. Hydrogen atoms were omitted for clarity. Atoms are color-coded as follows: Na, magenta; O, red; C, grey; N, light blue; B, peach.

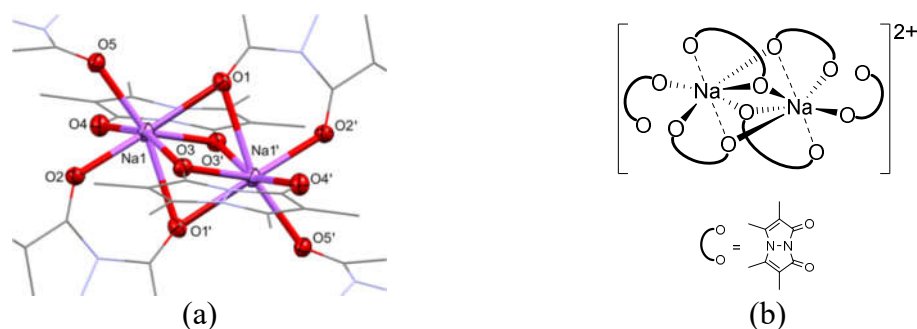

**Figure S18.** First coordination sphere of complex **2**: (a) crystal structure (with thermal ellipsoids at the 50% probability level); (b) schematic representation.

| <b>Table S3.</b> Bimane scaffold bond lengths (Å) for symmetry-independent bonds in complexes <b>2-4</b> in comparison with uncoordinated <i>syn</i> -(Me,Me)bimane. |            |           |                         |                         |                              |                           |
|----------------------------------------------------------------------------------------------------------------------------------------------------------------------|------------|-----------|-------------------------|-------------------------|------------------------------|---------------------------|
| Bond                                                                                                                                                                 | Complex 2  | Complex 3 | Complex 4 (polymorph A) | Complex 4 (polymorph B) | Total average for complexes* | <i>syn</i> -(Me,Me)bimane |
| C=O                                                                                                                                                                  | 1.2101(19) | 1.188(11) | 1.2246(15)              | 1.2262(14)              | 1.220 ± 0.015                | 1.211(5)                  |
|                                                                                                                                                                      | 1.2147(19) | 1.191(10) | 1.2266(15)              | 1.2275(15)              |                              | 1.215(5)                  |
|                                                                                                                                                                      | 1.2177(18) | 1.215(10) |                         |                         |                              |                           |
|                                                                                                                                                                      | 1.2198(18) | 1.219(11) |                         |                         |                              |                           |
|                                                                                                                                                                      | 1.2253(18) | 1.224(11) |                         |                         |                              |                           |
|                                                                                                                                                                      | 1.2299(18) | 1.224(10) |                         |                         |                              |                           |
|                                                                                                                                                                      |            | 1.234(10) |                         |                         |                              |                           |
|                                                                                                                                                                      | 1.250(11)  |           |                         |                         |                              |                           |
| OC-C                                                                                                                                                                 | 1.444(2)   | 1.407(11) | 1.4453(17)              | 1.4463(17)              | 1.448 ± 0.022                | 1.456(5)                  |
|                                                                                                                                                                      | 1.444(2)   | 1.429(12) | 1.4498(17)              | 1.4464(17)              |                              | 1.450(5)                  |
|                                                                                                                                                                      | 1.450(2)   | 1.437(10) |                         |                         |                              |                           |
|                                                                                                                                                                      | 1.453(2)   | 1.439(13) |                         |                         |                              |                           |
|                                                                                                                                                                      | 1.453(2)   | 1.439(13) |                         |                         |                              |                           |
|                                                                                                                                                                      | 1.460(2)   | 1.450(12) |                         |                         |                              |                           |
|                                                                                                                                                                      |            | 1.453(12) |                         |                         |                              |                           |
|                                                                                                                                                                      | 1.514(12)  |           |                         |                         |                              |                           |
| C=C                                                                                                                                                                  | 1.349(2)   | 1.272(15) | 1.3608(17)              | 1.3615(17)              | 1.354 ± 0.030                | 1.359(5)                  |
|                                                                                                                                                                      | 1.349(2)   | 1.331(14) | 1.3632(17)              | 1.3641(17)              |                              | 1.356(5)                  |
|                                                                                                                                                                      | 1.357(2)   | 1.343(13) |                         |                         |                              |                           |
|                                                                                                                                                                      | 1.361(2)   | 1.345(12) |                         |                         |                              |                           |
|                                                                                                                                                                      | 1.362(2)   | 1.349(12) |                         |                         |                              |                           |
|                                                                                                                                                                      | 1.366(2)   | 1.354(12) |                         |                         |                              |                           |
|                                                                                                                                                                      |            | 1.378(13) |                         |                         |                              |                           |
|                                                                                                                                                                      | 1.423(13)  |           |                         |                         |                              |                           |
| OC-N**                                                                                                                                                               | 1.4072(19) | 1.414(10) | 1.4046(15)              | 1.4026(15)              | 1.408 ± 0.006                | 1.403(5)                  |
|                                                                                                                                                                      | 1.418(2)   | 1.412(9)  | 1.4069(15)              | 1.4052(15)              |                              | 1.415(5)                  |
|                                                                                                                                                                      | 1.3991(19) |           |                         |                         |                              |                           |
|                                                                                                                                                                      | 1.4038(19) |           |                         |                         |                              |                           |
| CC-N**                                                                                                                                                               | 1.382(2)   | 1.343(11) | 1.3921(15)              | 1.3906(15)              | 1.384 ± 0.017                | 1.380(5)                  |
|                                                                                                                                                                      | 1.3850(19) | 1.394(11) | 1.3923(15)              | 1.3920(15)              |                              | 1.394(5)                  |
|                                                                                                                                                                      | 1.3919(19) |           |                         |                         |                              |                           |
|                                                                                                                                                                      | 1.394(2)   |           |                         |                         |                              |                           |
| N-N**                                                                                                                                                                | 1.3856(17) | 1.413(10) | 1.3711(13)              | 1.3730(13)              | 1.383 ± 0.018                | 1.372(3)                  |
|                                                                                                                                                                      | 1.3719(18) |           |                         |                         |                              |                           |

\* Averaging excludes polymorph B of complex **4**.

\*\* Complexes **2** and **3** are disordered at bimane nitrogen atoms. This table only includes bond lengths that are associated with non-disordered nitrogen atoms.

| Complex 2  | Complex 3 | Complex 4 (polymorph A) | Complex 4 (polymorph B) | Total average* |
|------------|-----------|-------------------------|-------------------------|----------------|
| 2.3293(12) | 2.364(7)  | 2.2902(9)               | 2.2894(9)               | 2.42 ± 0.10    |
| 2.3600(12) | 2.372(7)  | 2.3138(10)              | 2.3127(10)              |                |
| 2.4295(12) | 2.378(7)  |                         |                         |                |
| 2.4798(12) | 2.381(7)  |                         |                         |                |
| 2.5200(12) | 2.388(6)  |                         |                         |                |
| 2.5335(12) | 2.407(7)  |                         |                         |                |
| 2.7031(12) | 2.408(7)  |                         |                         |                |
|            | 2.436(8)  |                         |                         |                |
|            | 2.461(7)  |                         |                         |                |
|            | 2.485(7)  |                         |                         |                |

\* Averaging excludes polymorph B of complex 4.

**X-ray crystallographic analysis of complex 3.** Crystals of complex 3 suitable for X-ray diffraction were grown at 4 °C from an acetonitrile solution overlaid with diethyl ether. The crystal parameters are given in Table S1, and the crystal structure of the complex is shown in Figures S19 and S20. Select bond lengths are collected in Tables S3 and S4. For comparative purposes, Table S3 also contains data for the low-temperature structure of *syn*-(Me,Me)bimane.

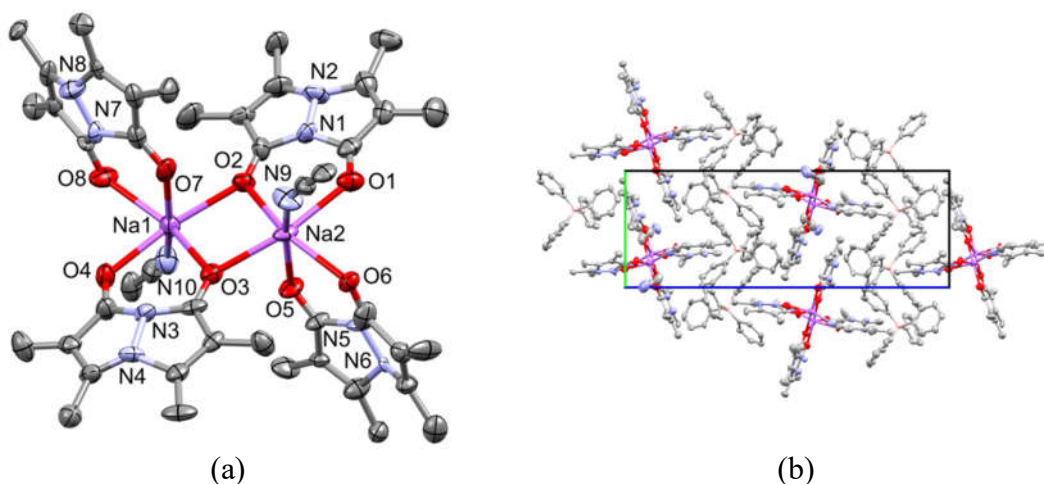

**Figure S19.** Crystal structure of complex 3 (with thermal ellipsoids at the 50% probability level): (a) dicationic fragment; (b) unit cell, viewed along the *a* axis. Hydrogen atoms were omitted for clarity. Atoms are color-coded as follows: Na, magenta; O, red; C, grey; N, light blue; B, peach.

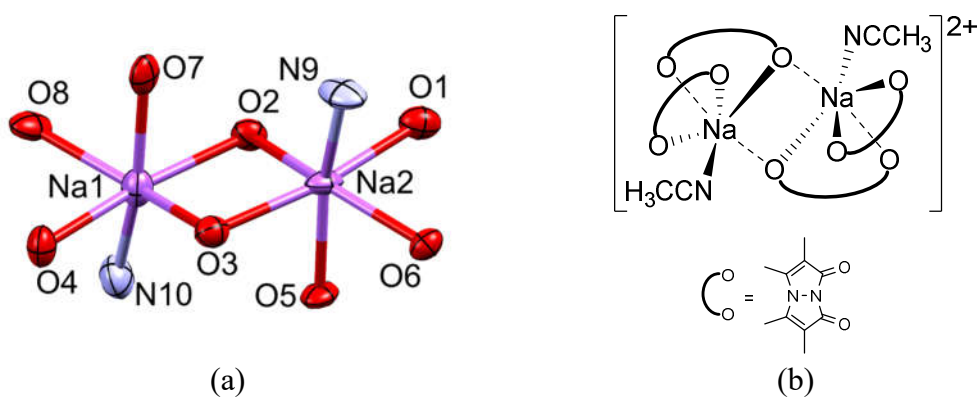

**Figure S20.** First coordination sphere of complex **3**: (a) crystal structure (with thermal ellipsoids at the 50% probability level); (b) schematic representation.

**X-ray crystallographic analysis of complex 4.** Diffraction-quality crystals of complex **4** were grown at room temperature from a chloroform solution overlaid with diethyl ether. The crystal parameters are listed in Table S1, and the crystal structure of the complex is depicted in Figure S21. Select bond lengths are given in Tables S3 and S4. For comparative purposes, Table S3 also contains data for the low-temperature structure of *syn*-(Me,Me)bimane.

A second crystal of complex **4** was isolated from a chloroform solution overlaid with diethyl ether, which was kept at 4 °C instead of room temperature. This crystal was found to be a polymorph of the aforementioned structure, belonging to the same monoclinic *C2/c* space group. It also has virtually identical lattice parameters, except for the lattice constant *c* (20.91 instead of 19.09 Å) and angle  $\beta$  (121.3 instead of 110.4°). The two polymorphs - A and B, respectively - have essentially identical structural metrics, as can be seen in Tables S3 and S4.

A second crystal of polymorph A of complex **4** was also isolated from C<sub>6</sub>H<sub>5</sub>F/Et<sub>2</sub>O, and identified by its lattice parameters.

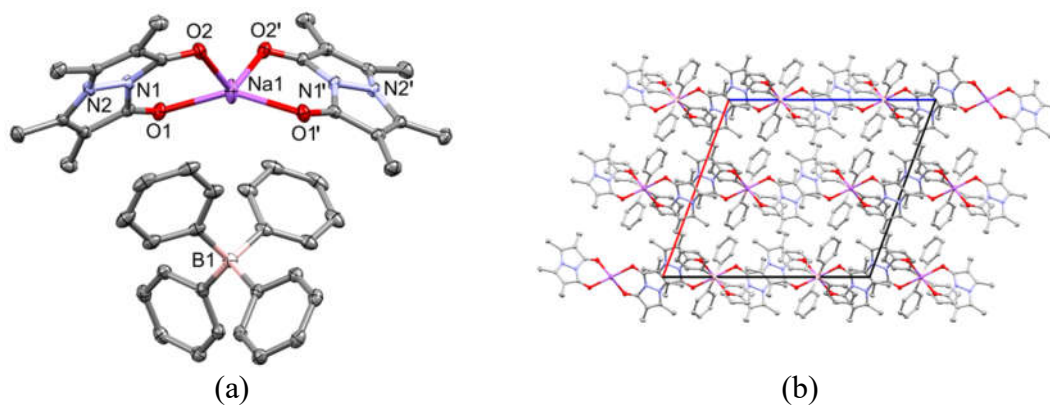

**Figure S21.** Crystal structure of complex **4** (with thermal ellipsoids at the 50% probability level): (a) cationic fragment; (b) unit cell, viewed along the *b* axis. Hydrogen atoms were omitted for clarity. Atoms are color-coded as follows: Na, magenta; O, red; C, grey; N, light blue; B, peach.

Scan ID: 233-BB-b\_m.raw • Michal • BB sol5&5 b\_m SC

Scan Parameters: 2.0°/40.0°/0.025°/1.5(s), I(p)=6666.0/5.0, Cu(40kV,40mA), Sunday, June 25, 2017, 11:03 AM

K $\alpha$ 2 Peaks Present     Zero Offset = 0.02159 (0.00441)     X-Ray Polarization = 1.0  
 Variable-Slit Pattern     Displacement = 0.0     K $\alpha$ 2/K $\alpha$ 1 Ratio = 0.5

Geometry: Diffractometer LpFitted-Range: 2.0 - 40.0°    BG-Model: Polynomial (2)  $\lambda$ : 1.54059 Å (Cu)

PSF: pseudo-Voigt    Broadening: Individual FWHM Curve    Instrument: Constant FWHM = 0.1°

| Phase ID (1)      | Chemical Formula                                                                                 | PDF-#                     | Wt% (esd)    | RIR  | $\mu$ |
|-------------------|--------------------------------------------------------------------------------------------------|---------------------------|--------------|------|-------|
| C108H112B2N12Na2O | C <sub>108</sub> H <sub>112</sub> B <sub>2</sub> N <sub>12</sub> Na <sub>2</sub> O <sub>12</sub> | [Na2(bimane)6][BPh4]2.cif | 100.0 (11.9) | 0.32 | 7.3   |

Refinement Converged (R/E=5.35), ♦ Round=3, Iter=3, P=115, R=18.35% (E=3.43%, EPS=0.5)

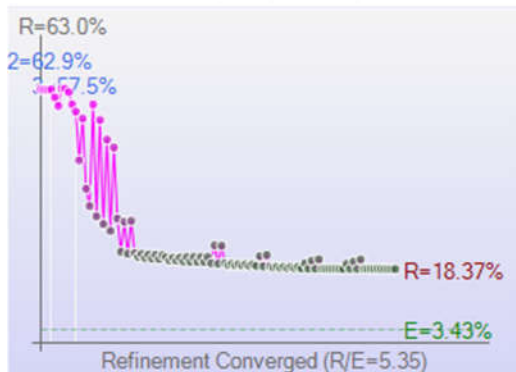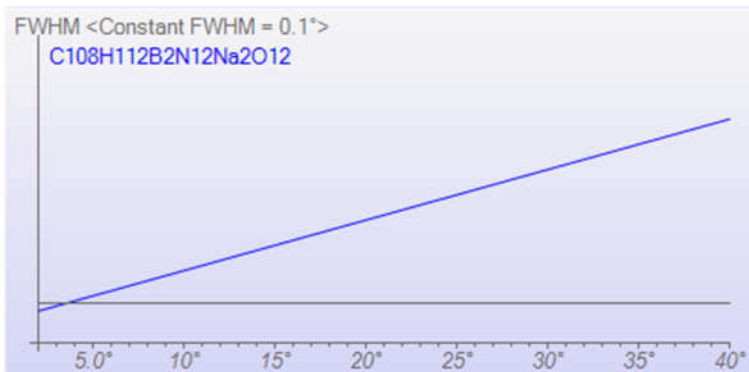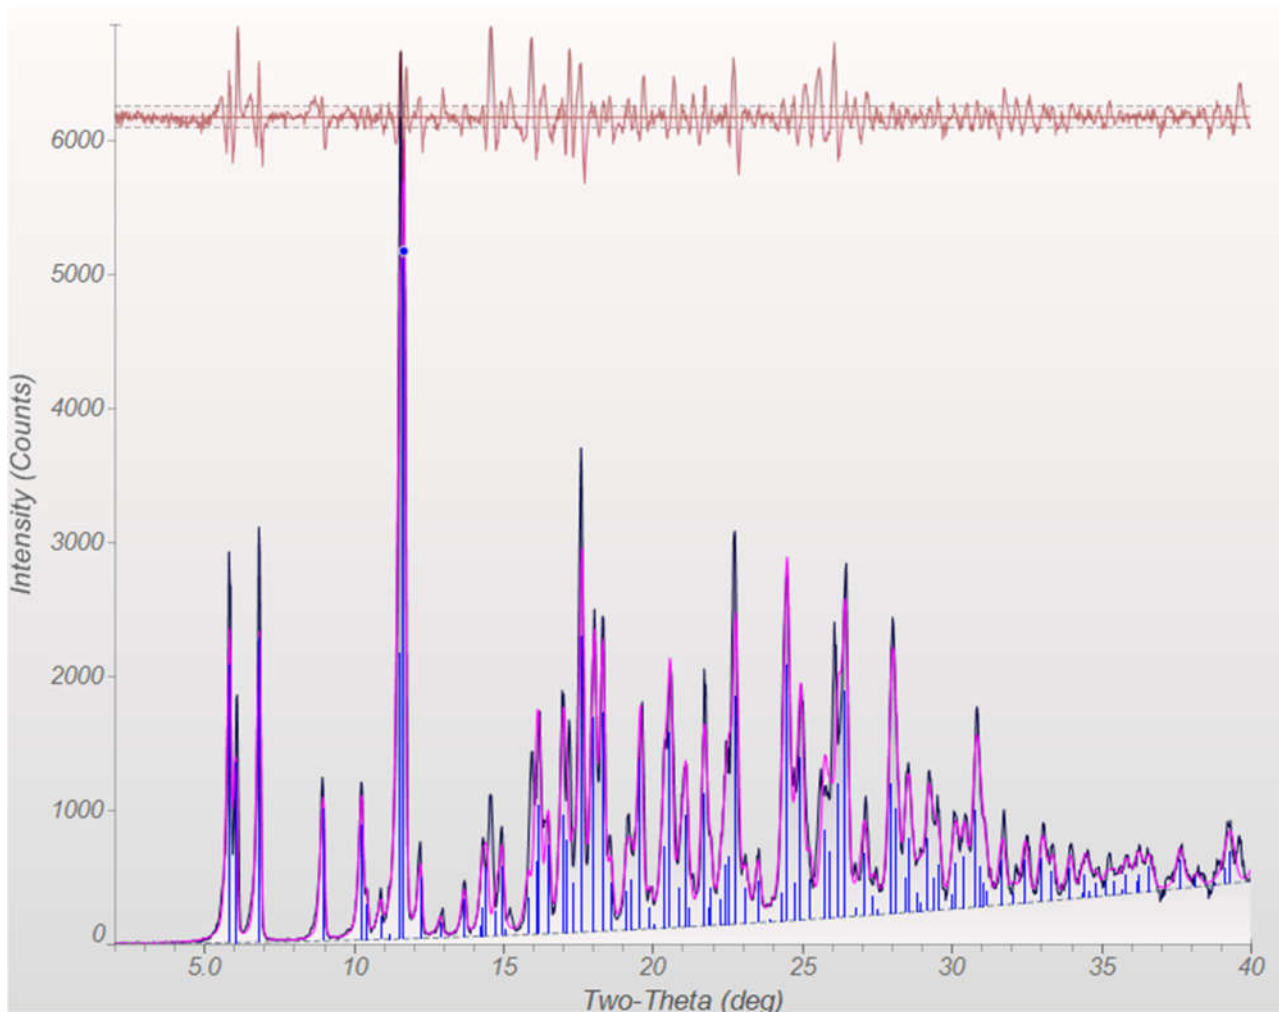

Figure S22. Powder X-ray diffraction data for complex 2.

Scan ID: 235-BB-b\_m.raw • Michal • BB sol5&5 b\_m SC

Scan Parameters: 2.0°/40.0°/0.025°/1.5(s), I(p)=9123.0/9.0, Cu(40kV,40mA), Sunday, June 25, 2017, 11:42 AM

K $\alpha$ 2 Peaks Present     Zero Offset = -0.25896 (0.00324)     X-Ray Polarization = 1.0  
 Variable-Slit Pattern     Displacement = 0.0     K $\alpha$ 2/K $\alpha$ 1 Ratio = 0.5

Geometry: Diffractometer LpFitted-Range: 2.0 - 40.0°    BG-Model: Polynomial (2)  $\lambda$ : 1.54059 Å (Cu)

PSF: pseudo-Voigt    Broadening: Individual FWHM Curve    Instrument: Constant FWHM = 0.1°

| Phase ID (2)     | Chemical Formula                                                                 | PDF-#                              | Wt% (esd)   | RIR  | $\mu$ |
|------------------|----------------------------------------------------------------------------------|------------------------------------|-------------|------|-------|
| C44H44BN4NaO4    | C <sub>44</sub> H <sub>44</sub> BN <sub>4</sub> NaO <sub>4</sub>                 | [Na(bimane)2][BPh4] (Oct 2016).cif | 97.5 (11.6) | 0.60 | 7.8   |
| C108H112B2N12Na2 | C <sub>108</sub> H <sub>112</sub> B <sub>2</sub> N <sub>12</sub> Na <sub>2</sub> | [Na2(bimane)6][BPh4]2.cif          | 2.5 (0.9)   | 0.32 | 7.7   |

XRF(Wt%): Na2O=4.2%, N2O=12.2%, CO2=266.3%, B2O3=4.8%

Refinement Halted (R/E=7.04), ♦ Round=3, Iter=11, P=131, R=22.98% (E=3.26%, EPS=0.5)

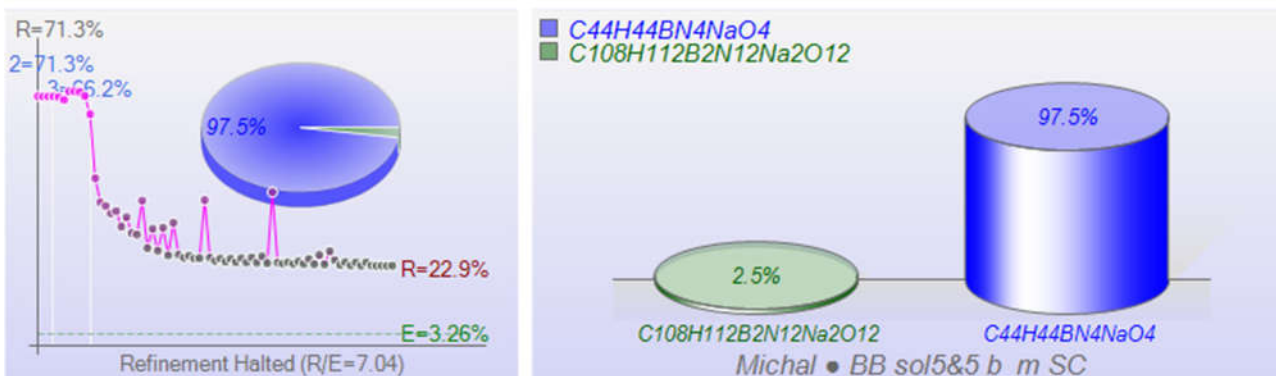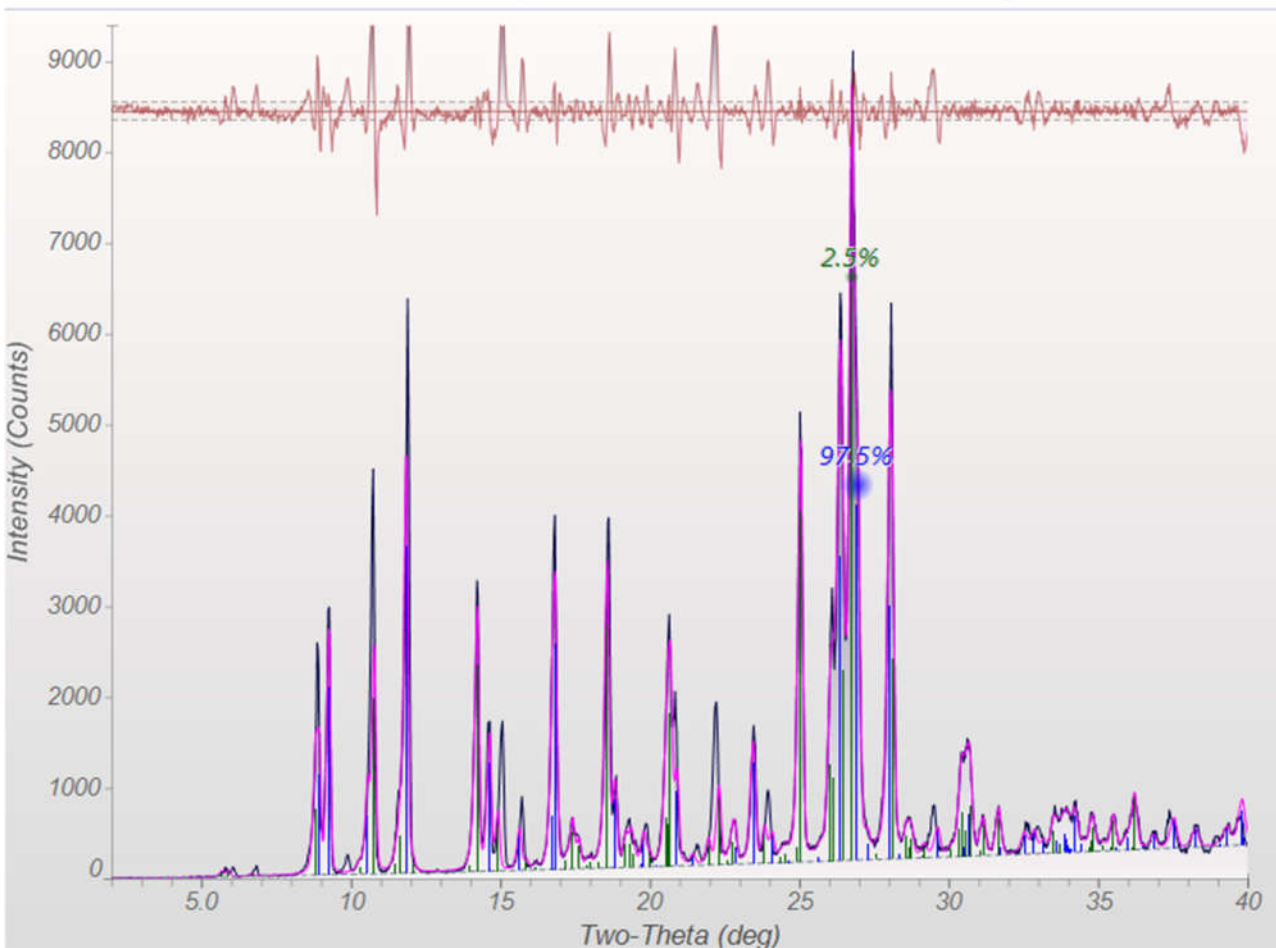

Figure S23. Powder X-ray diffraction data for complex 4. The sample also contains 2.5% of complex 2.



**Table S5.** Maximal absorbance at the  $n \rightarrow \pi^*$  band ( $A_{\max}$ ) and maximal fluorescence intensity ( $I_F$ )\* for 1 mM *syn*-(Me,Me)bimane in the presence of varying concentrations of NaBPh<sub>4</sub> in CHCl<sub>3</sub>, THF, CH<sub>3</sub>CN and H<sub>2</sub>O.  $A_{\max}$  and  $I_F$  are in %, relative to their values in the absence of the salt. Each value is averaged over the cited number of samples, and the standard deviation is given in parentheses.

| Solvent            | [NaBPh <sub>4</sub> ]<br>(mM) | Number of<br>samples | $A_{\max}$ | $I_F^*$<br>(uncorrected) | $I_F^*$<br>(Absorbance-<br>corrected) |
|--------------------|-------------------------------|----------------------|------------|--------------------------|---------------------------------------|
| CHCl <sub>3</sub>  | 0.10                          | 3                    | 95(3)      | 87(10)                   | 91(8)                                 |
|                    | 0.20                          | 3                    | 99(5)      | 83(8)                    | 84(12)                                |
|                    | 0.33                          | 3                    | 97(5)      | 74(6)                    | 76(7)                                 |
|                    | 0.50                          | 4                    | 91(3)      | 57(5)                    | 62(4)                                 |
| THF                | 0.10                          | 4                    | 97(1)      | 93(2)                    | 96(2)                                 |
|                    | 0.25                          | 4                    | 95(2)      | 84(2)                    | 89(2)                                 |
|                    | 0.33                          | 4                    | 93(4)      | 76(2)                    | 81(3)                                 |
|                    | 0.50                          | 4                    | 89(3)      | 65(1)                    | 72(2)                                 |
|                    | 1.0                           | 4                    | 85(4)      | 47(4)                    | 54(4)                                 |
|                    | 3.0                           | 8                    | 79(4)      | 26(6)                    | 31(7)                                 |
|                    | 5.0                           | 4                    | 78(5)      | 13(2)                    | 16(2)                                 |
| 10.0               | 5                             | 75(2)                | 8(1)       | 10(2)                    |                                       |
| CH <sub>3</sub> CN | 0.50                          | 3                    | 96(5)      | 91(2)                    | 94(2)                                 |
|                    | 3.0                           | 3                    | 96(8)      | 82(1)                    | 86(6)                                 |
|                    | 10.0                          | 3                    | 99(2)      | 65(7)                    | 67(7)                                 |
| H <sub>2</sub> O   | 0.50                          | 4                    | 96(9)      | 94(3)                    | 99(7)                                 |
|                    | 1.0                           | 3                    | 97(4)      | 88(4)                    | 92(5)                                 |
|                    | 3.0                           | 3                    | 98(7)      | 78(7)                    | 80(2)                                 |
|                    | 5.0                           | 4                    | 94(6)      | 64(5)                    | 68(2)                                 |
|                    | 10.0                          | 5                    | 98(3)      | 53(4)                    | 55(5)                                 |

\*  $\lambda_{\text{ex}}$  (nm): CHCl<sub>3</sub>, 370; THF, 370; CH<sub>3</sub>CN, 370; H<sub>2</sub>O, 380.

**Table S6.** Wavelengths at maximal absorbance of the  $n \rightarrow \pi^*$  band ( $\lambda_{\max}$ ) and maximal fluorescence emission ( $\lambda_{\text{em}}$ ) for 1 mM *syn*-(Me,Me)bimane in the presence of varying concentrations of NaBPh<sub>4</sub> in CHCl<sub>3</sub>, THF, CH<sub>3</sub>CN and H<sub>2</sub>O. All wavelengths are in nm. Each value is averaged over the cited number of samples, and the standard deviation is given in parentheses.

| Solvent            | [NaBPh <sub>4</sub> ]<br>(mM) | Number of<br>samples | $\lambda_{\max}$ | $\lambda_{\text{em}}$ |
|--------------------|-------------------------------|----------------------|------------------|-----------------------|
| CHCl <sub>3</sub>  | 0.00                          | 4                    | 368(2)           | 429(1)                |
|                    | 0.10                          | 3                    | 368.3(6)         | 429.7(6)              |
|                    | 0.33                          | 3                    | 369(3)           | 430(2)                |
|                    | 0.50                          | 4                    | 371(1)           | 429.5(6)              |
| THF                | 0.00                          | 9                    | 361(1)           | 421(2)                |
|                    | 0.10                          | 4                    | 361.3(5)         | 420.5(6)              |
|                    | 0.25                          | 4                    | 362(2)           | 420(2)                |
|                    | 0.33                          | 4                    | 363(1)           | 421(1)                |
|                    | 0.50                          | 4                    | 364.0(8)         | 422(2)                |
|                    | 1.0                           | 4                    | 366(2)           | 423.0(8)              |
|                    | 3.0                           | 8                    | 369(1)           | 428(5)                |
|                    | 5.0                           | 4                    | 372(2)           | 433(6)                |
| CH <sub>3</sub> CN | 0.00                          | 4                    | 369(2)           | 434(1)                |
|                    | 0.50                          | 3                    | 369(1)           | 433.0(5)              |
|                    | 3.0                           | 3                    | 369.7(6)         | 434(1)                |
|                    | 10.0                          | 4                    | 371(2)           | 436(1)                |
| H <sub>2</sub> O   | 0.00                          | 5                    | 388(2)           | 476(1)                |
|                    | 0.50                          | 4                    | 387.0(8)         | 477(2)                |
|                    | 1.0                           | 3                    | 388(2)           | 477(2)                |
|                    | 3.0                           | 3                    | 388(2)           | 476(2)                |
|                    | 5.0                           | 4                    | 387(1)           | 477(2)                |
|                    | 10.0                          | 4                    | 388(1)           | 477(2)                |

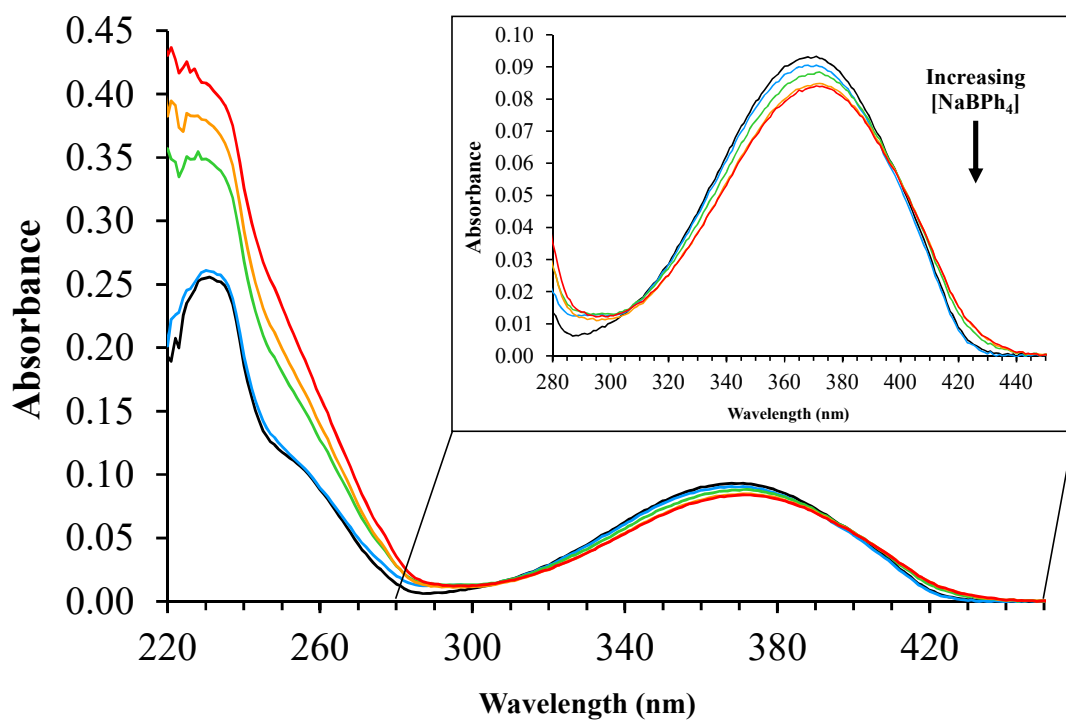

**Figure S24.** UV-Vis absorbance spectra of 1 mM *syn*-(Me,Me)bimane in  $\text{CHCl}_3$ , in the presence of increasing concentrations of  $\text{NaBPh}_4$ . The plots correspond to  $[\text{NaBPh}_4] = 0, 0.10, 0.25, 0.33, 0.50$  mM. The optical pathlength was 0.1 mm.

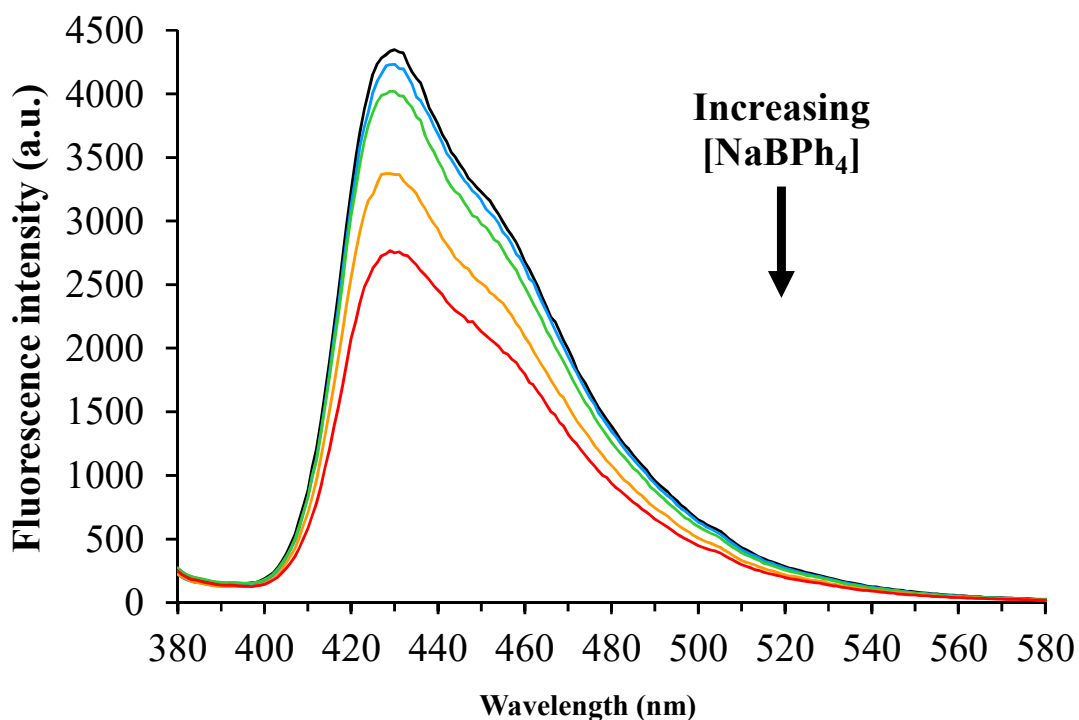

**Figure S25.** Fluorescence emission spectra of 1 mM *syn*-(Me,Me)bimane in  $\text{CHCl}_3$ , in the presence of increasing concentrations of  $\text{NaBPh}_4$  ( $\lambda_{\text{ex}} = 370$  nm). The plots correspond to  $[\text{NaBPh}_4] = 0, 0.10, 0.25, 0.33, 0.50$  mM.

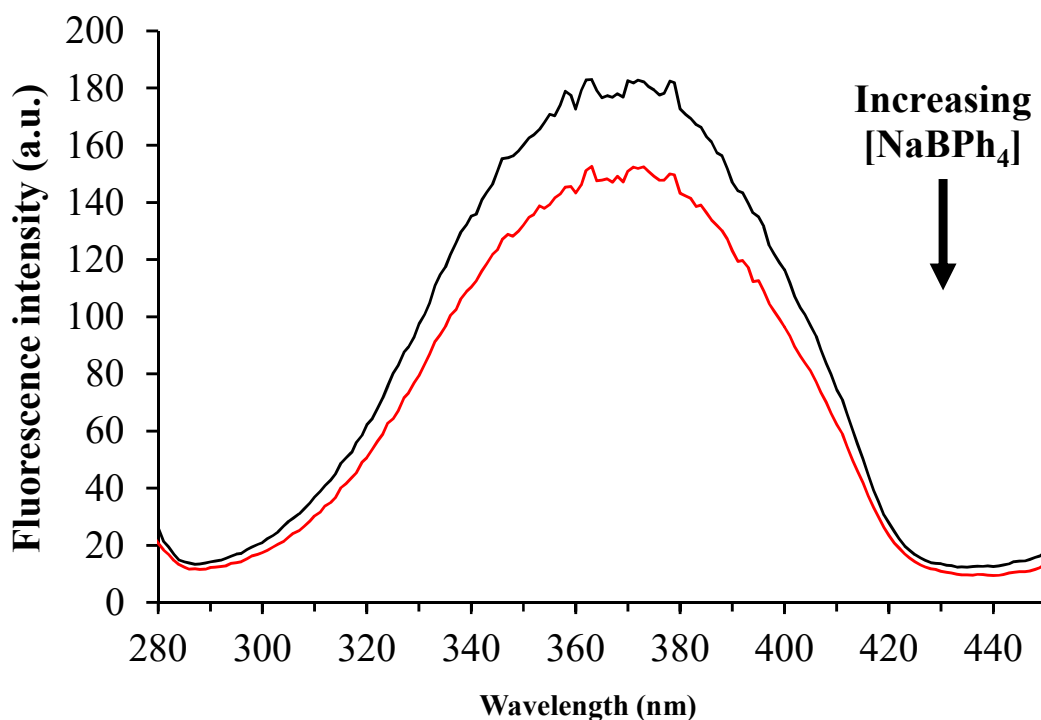

**Figure S26.** Fluorescence excitation spectra of 1 mM *syn*-(Me,Me)bimane in  $\text{CHCl}_3$ , in the absence and presence of  $\text{NaBPh}_4$  ( $\lambda_{\text{em}} = 480 \text{ nm}$ ). The plots correspond to  $[\text{NaBPh}_4] = 0, 0.50 \text{ mM}$ . Only the  $n \rightarrow \pi^*$  band is shown.

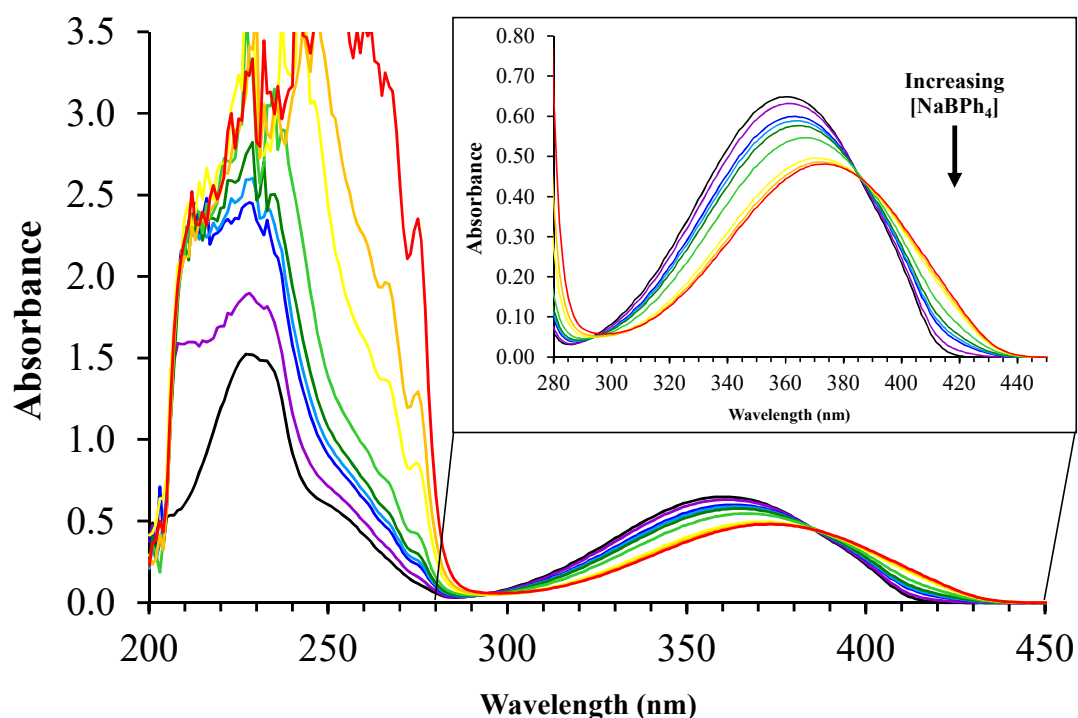

**Figure S27.** UV-Vis absorbance spectra of 1 mM *syn*-(Me,Me)bimane in THF, in the presence of increasing concentrations of  $\text{NaBPh}_4$ . The plots correspond to  $[\text{NaBPh}_4] = 0, 0.10, 0.25, 0.33, 0.50, 1.0, 3.0, 5.0, 10.0 \text{ mM}$ .

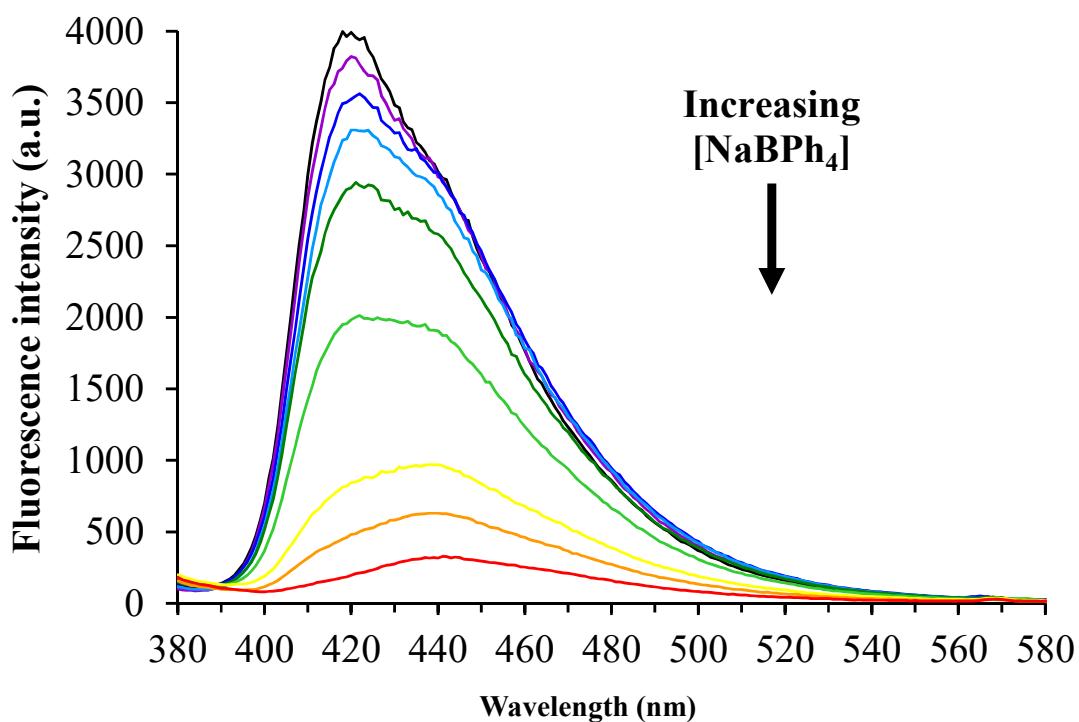

**Figure S28.** Fluorescence emission spectra of 1 mM *syn*-(Me,Me)bimane in THF, in the presence of increasing concentrations of NaBPh<sub>4</sub> ( $\lambda_{\text{ex}} = 360$  nm). The plots correspond to [NaBPh<sub>4</sub>] = 0, 0.10, 0.25, 0.33, 0.50, 1.0, 3.0, 5.0, 10.0 mM.

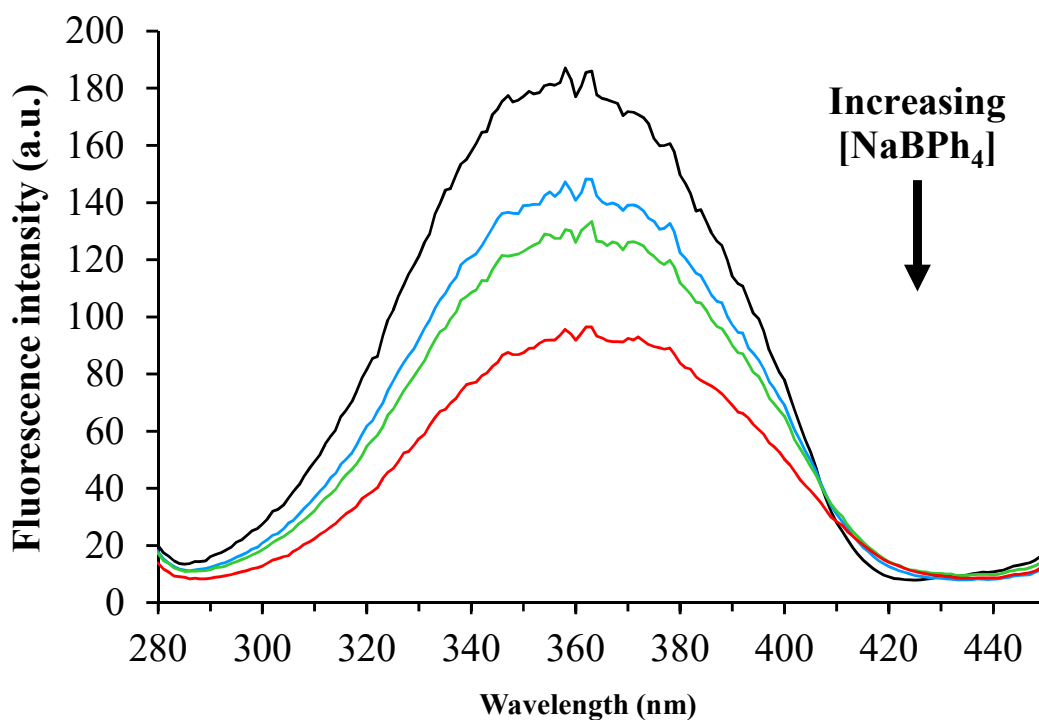

**Figure S29.** Fluorescence excitation spectra of 1 mM *syn*-(Me,Me)bimane in THF, in the presence of increasing concentrations of NaBPh<sub>4</sub> ( $\lambda_{\text{em}} = 475$  nm). The plots correspond to [NaBPh<sub>4</sub>] = 0, 0.33, 0.50, 1.0 mM. Only the  $n \rightarrow \pi^*$  band is shown.

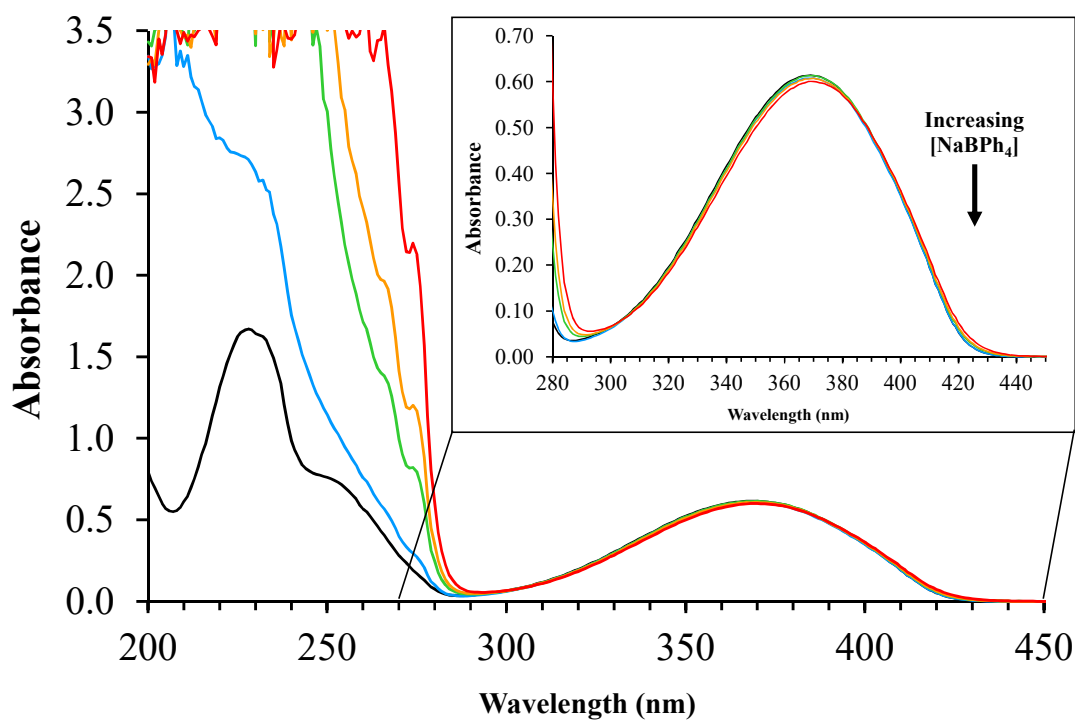

**Figure S30.** UV-Vis absorbance spectra of 1 mM *syn*-(Me,Me)bimane in CH<sub>3</sub>CN, in the presence of increasing concentrations of NaBPh<sub>4</sub>. The plots correspond to [NaBPh<sub>4</sub>] = 0, 0.50, 3.0, 5.0, 10.0 mM.

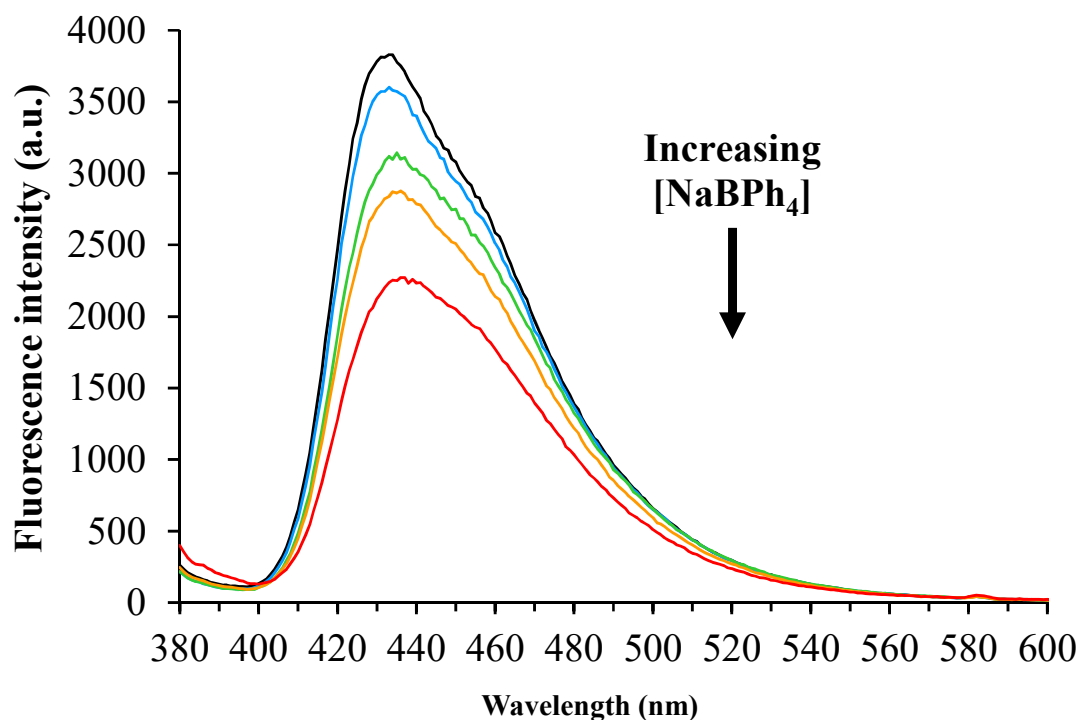

**Figure S31.** Fluorescence emission spectra of 1 mM *syn*-(Me,Me)bimane in CH<sub>3</sub>CN, in the presence of increasing concentrations of NaBPh<sub>4</sub> ( $\lambda_{\text{ex}} = 369$  nm). The plots correspond to [NaBPh<sub>4</sub>] = 0, 0.50, 3.0, 5.0, 10.0 mM.

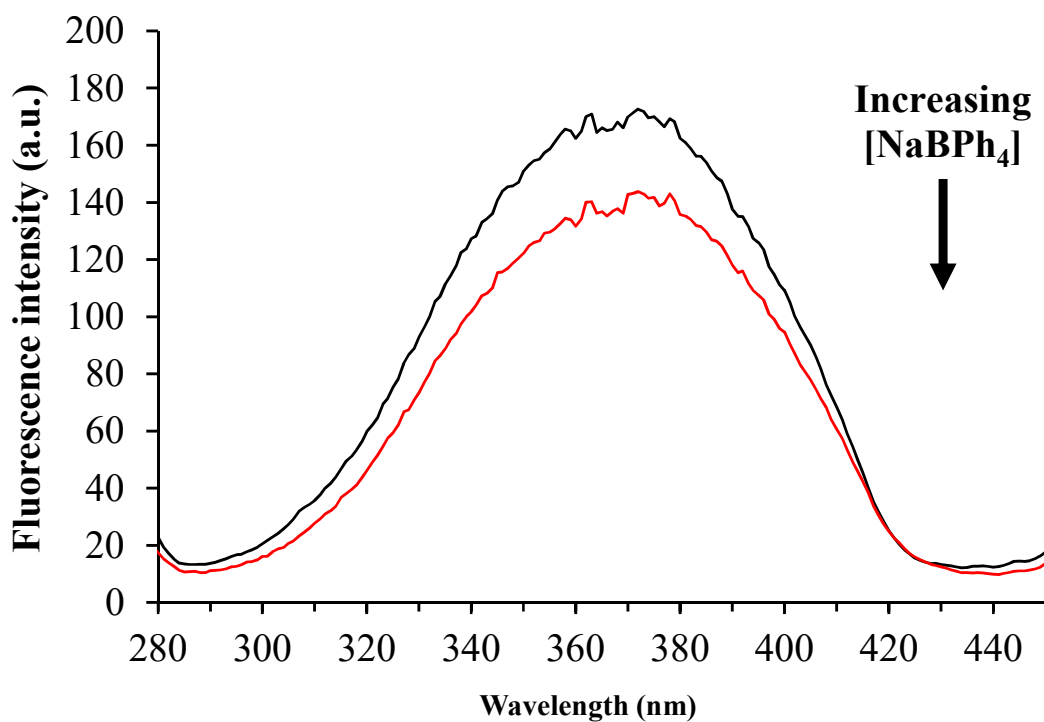

**Figure S32.** Fluorescence excitation spectra of 1 mM *syn*-(Me,Me)bimane in  $\text{CH}_3\text{CN}$ , in the absence and presence of  $\text{NaBPh}_4$  ( $\lambda_{\text{em}} = 485 \text{ nm}$ ). The plots correspond to  $[\text{NaBPh}_4] = 0, 10.0 \text{ mM}$ . Only the  $n \rightarrow \pi^*$  band is shown.

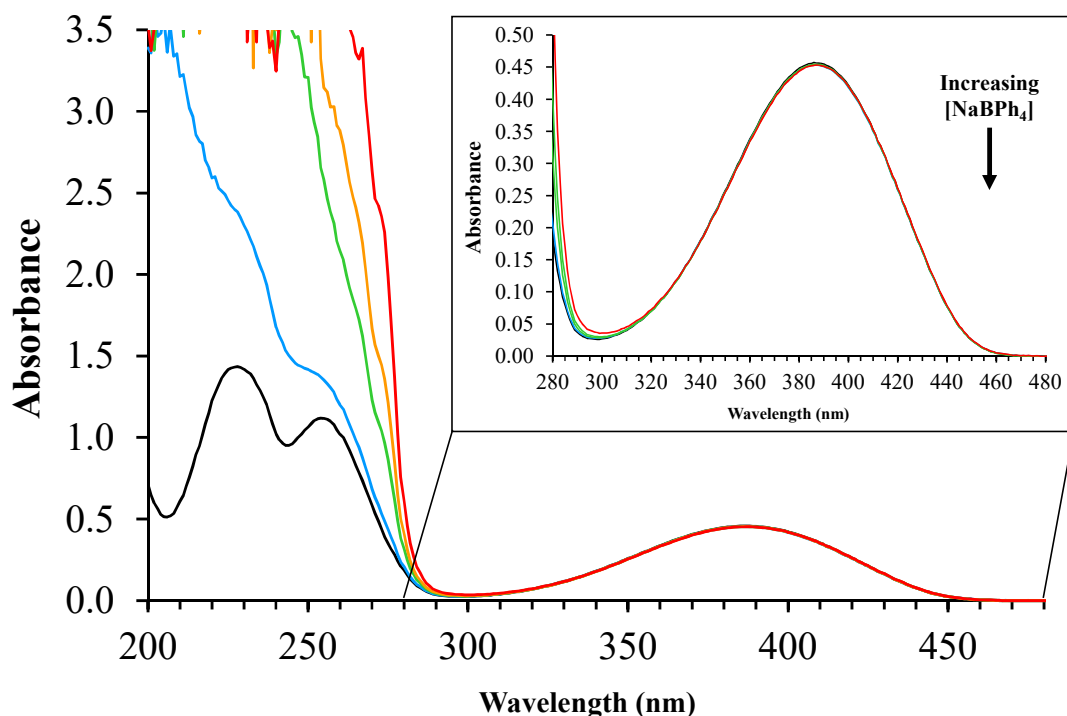

**Figure S33.** UV-Vis absorbance spectra of 1 mM *syn*-(Me,Me)bimane in  $\text{H}_2\text{O}$ , in the presence of increasing concentrations of  $\text{NaBPh}_4$ . The plots correspond to  $[\text{NaBPh}_4] = 0, 0.50, 3.0, 5.0, 10.0 \text{ mM}$ .

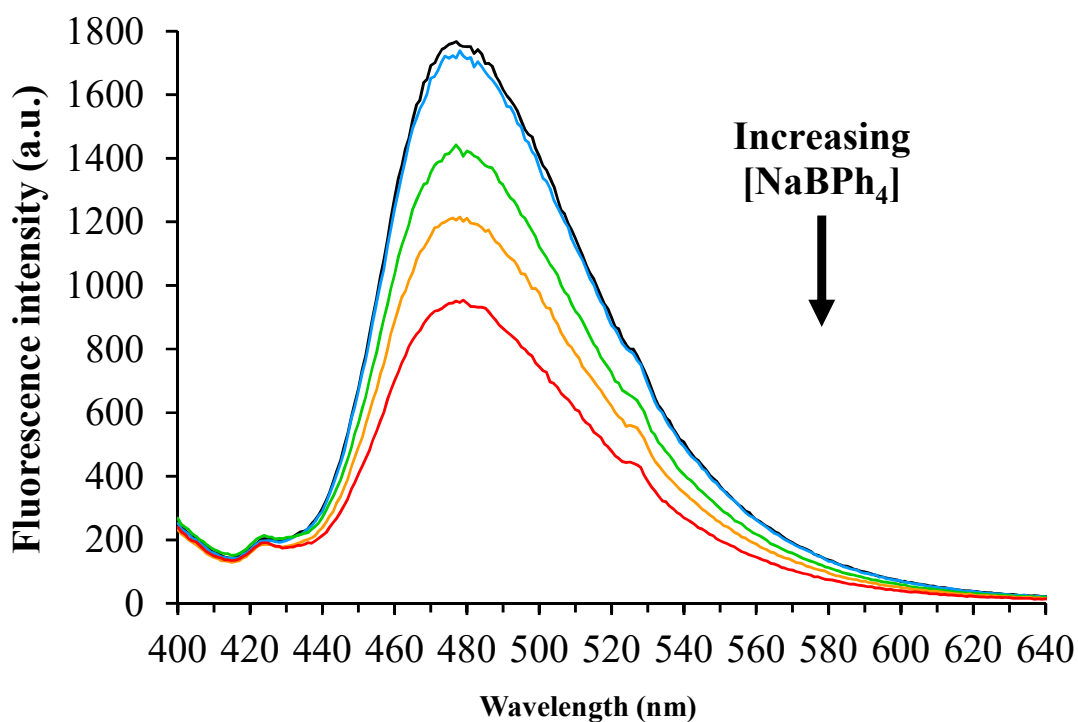

**Figure S34.** Fluorescence emission spectra of 1 mM *syn*-(Me,Me)bimane in H<sub>2</sub>O, in the presence of increasing concentrations of NaBPh<sub>4</sub> ( $\lambda_{\text{ex}} = 390$  nm). The plots correspond to [NaBPh<sub>4</sub>] = 0, 0.50, 3.0, 5.0, 10.0 mM.

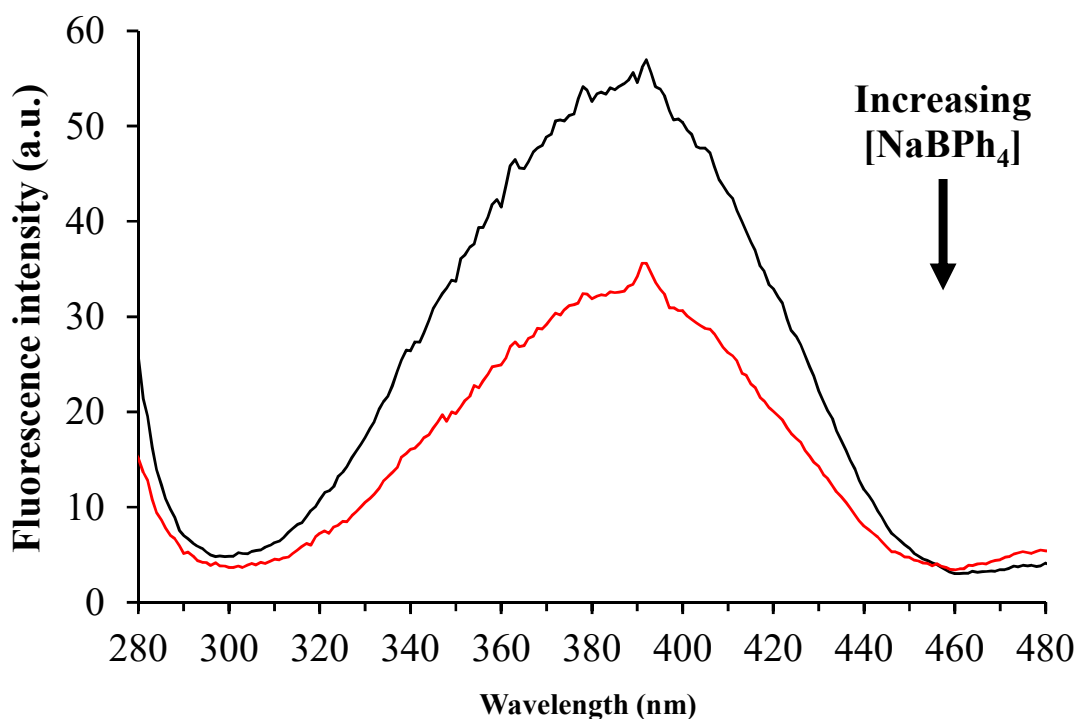

**Figure S35.** Fluorescence excitation spectra of 1 mM *syn*-(Me,Me)bimane in H<sub>2</sub>O, in the absence and presence of NaBPh<sub>4</sub> ( $\lambda_{\text{em}} = 535$  nm). The plots correspond to [NaBPh<sub>4</sub>] = 0, 10.0 mM. Only the  $n \rightarrow \pi^*$  band is shown.



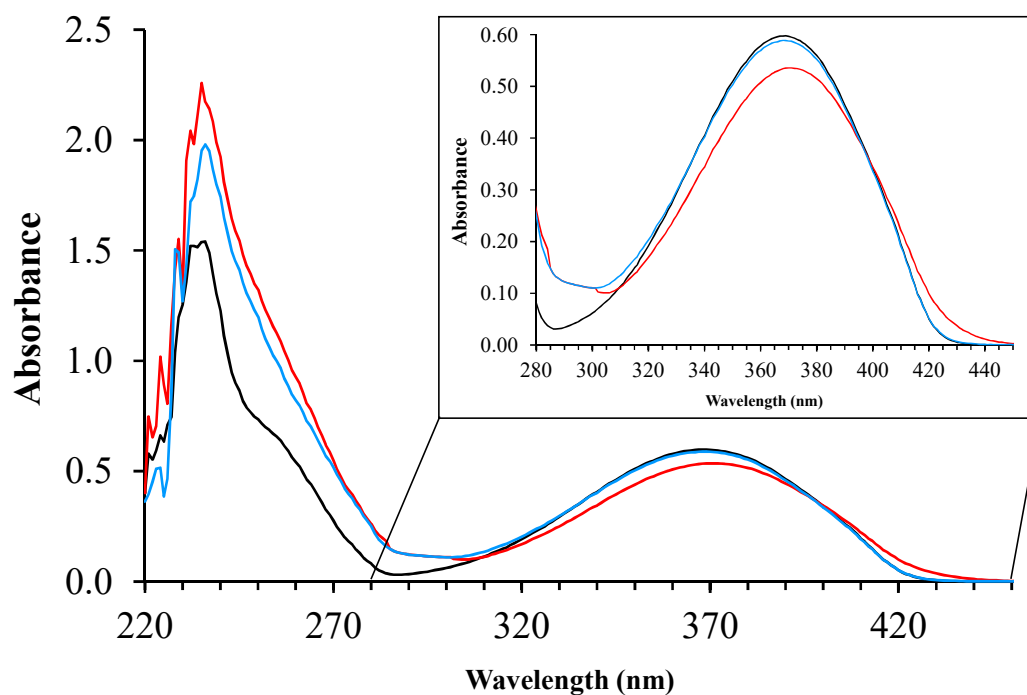

**Figure S36.** UV-Vis absorbance spectra of 1 mM *syn*-(Me,Me)bimane in  $\text{CHCl}_3$ , in the absence and presence of  $\text{NaBPh}_4$ , and after addition of 18-crown-6 to the sodium-containing mixture: (a) black, no added  $\text{NaBPh}_4$ ; (b) red, 0.5 mM  $\text{NaBPh}_4$ ; (c) blue, 0.5 mM  $\text{NaBPh}_4$  + 0.75 mM 18-crown-6. The blue and black plots overlap.

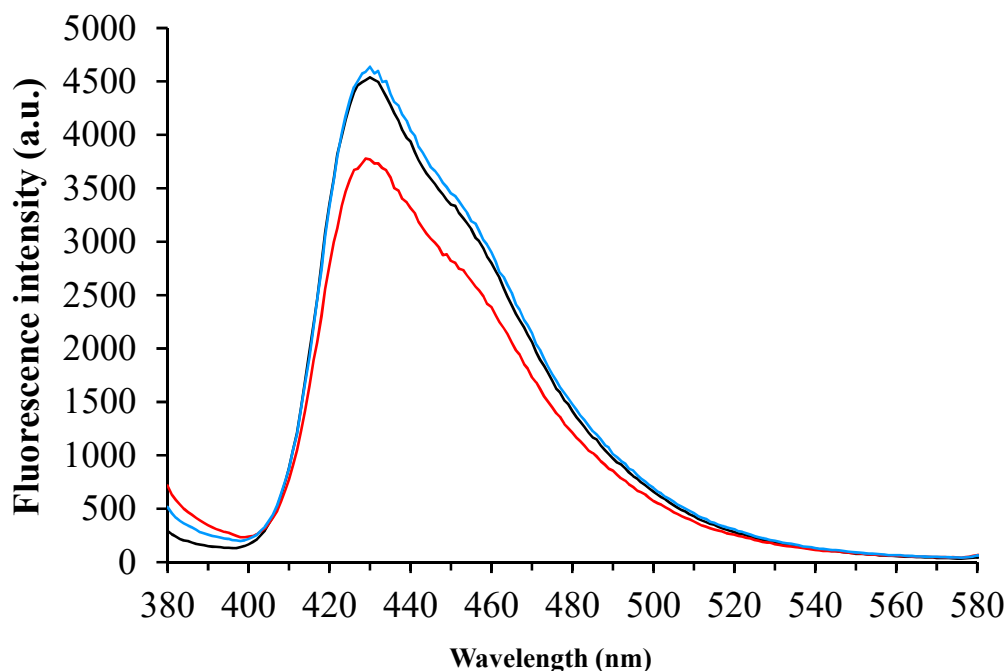

**Figure S37.** Fluorescence emission spectra of 1 mM *syn*-(Me,Me)bimane in  $\text{CHCl}_3$  ( $\lambda_{\text{ex}} = 368$  nm), in the absence and presence of  $\text{NaBPh}_4$ , and after addition of 18-crown-6 to the sodium-containing mixture: (a) black, no added  $\text{NaBPh}_4$ ; (b) red, 0.5 mM  $\text{NaBPh}_4$ ; (c) blue, 0.5 mM  $\text{NaBPh}_4$  + 0.75 mM 18-crown-6. The blue and black plots partly overlap.

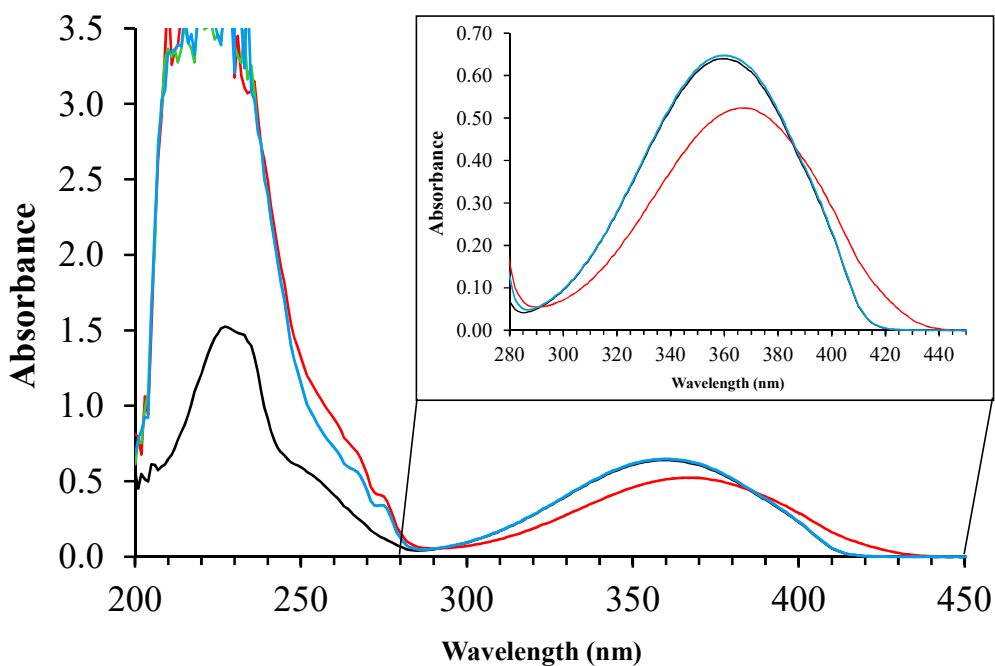

**Figure S38.** UV-Vis absorbance spectra of 1 mM *syn*-(Me,Me)bimane in THF, in the absence and presence of NaBPh<sub>4</sub>, and after addition of 18-crown-6 to the sodium-containing mixture: (a) black, no added NaBPh<sub>4</sub>; (b) red, 1 mM NaBPh<sub>4</sub>; (c) green, 1 mM NaBPh<sub>4</sub> + 1 mM 18-crown-6; (d) blue, 1 mM NaBPh<sub>4</sub> + 2 mM 18-crown-6. The blue, green and black plots overlap.

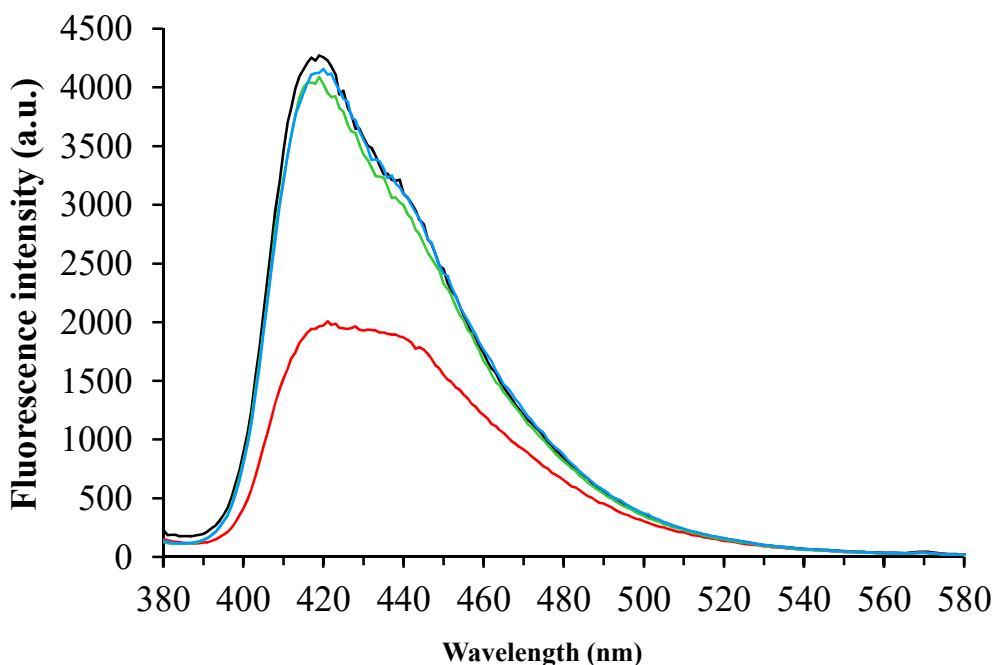

**Figure S39.** Fluorescence emission spectra of 1 mM *syn*-(Me,Me)bimane in THF ( $\lambda_{\text{ex}} = 361$  nm), in the absence and presence of NaBPh<sub>4</sub>, and after addition of 18-crown-6 to the sodium-containing mixture: (a) black, no added NaBPh<sub>4</sub>; (b) red, 1 mM NaBPh<sub>4</sub>; (c) green, 1 mM NaBPh<sub>4</sub> + 1 mM 18-crown-6; (d) blue, 1 mM NaBPh<sub>4</sub> + 2 mM 18-crown-6. The green, blue and black plots partly overlap.

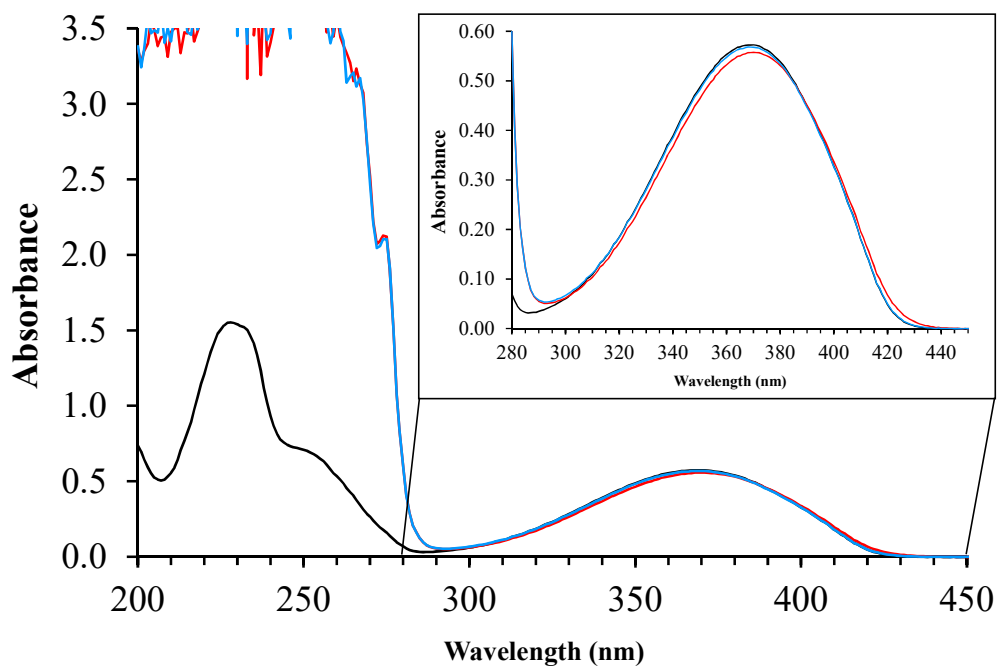

**Figure S40.** UV-Vis absorbance spectra of 1 mM *syn*-(Me,Me)bimane in CH<sub>3</sub>CN, in the absence and presence of NaBPh<sub>4</sub>, and after addition of 18-crown-6 to the sodium-containing mixture: (a) black, no added NaBPh<sub>4</sub>; (b) red, 10 mM NaBPh<sub>4</sub>; (c) blue, 10 mM NaBPh<sub>4</sub> + 10 mM 18-crown-6. The blue and black plots overlap.

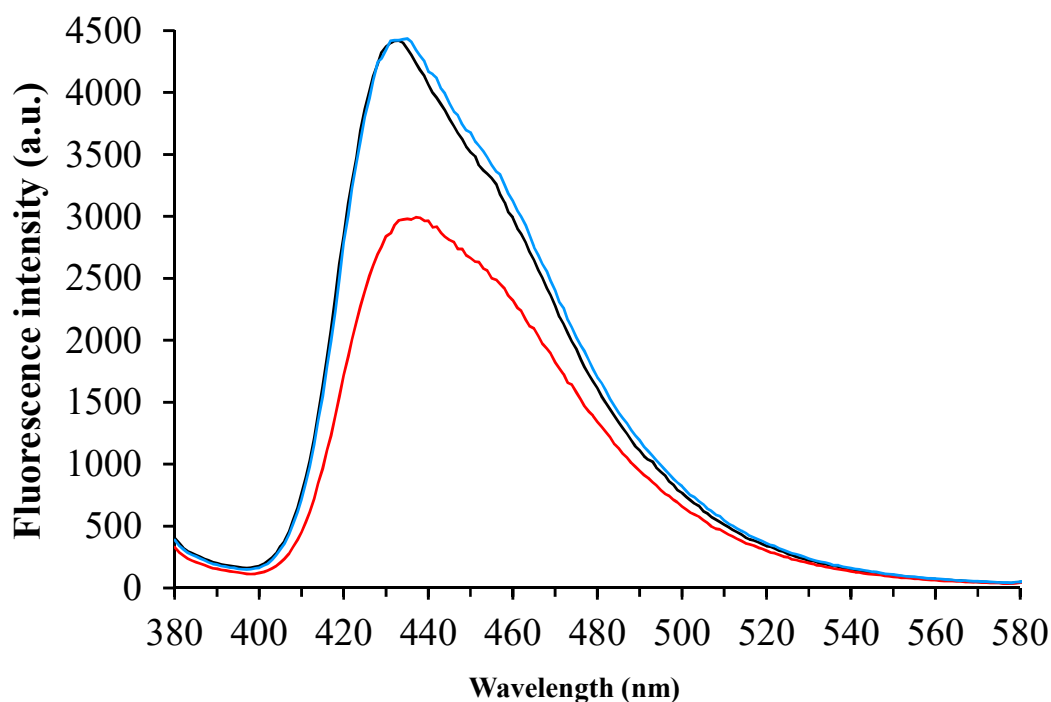

**Figure S41.** Fluorescence emission spectra of 1 mM *syn*-(Me,Me)bimane in CH<sub>3</sub>CN ( $\lambda_{\text{ex}} = 369$  nm), in the absence and presence of NaBPh<sub>4</sub>, and after addition of 18-crown-6 to the sodium-containing mixture: (a) black, no added NaBPh<sub>4</sub>; (b) red, 10 mM NaBPh<sub>4</sub>; (c) blue, 10 mM NaBPh<sub>4</sub> + 10 mM 18-crown-6. The blue and black plots partly overlap.

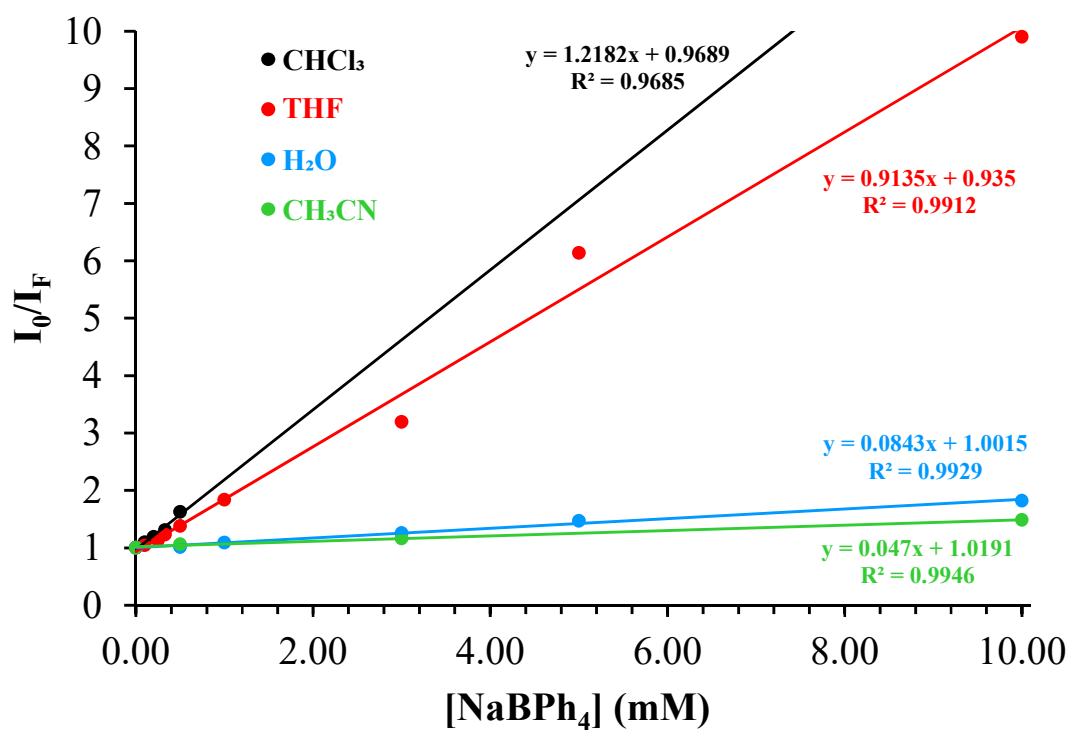

**Figure S42.** Stern-Volmer plots for the fluorescence quenching of 1 mM *syn*-(Me,Me)bimane by NaBPh<sub>4</sub> in CHCl<sub>3</sub>, THF, CH<sub>3</sub>CN and H<sub>2</sub>O. The graphs were generated using the absorbance-corrected fluorescence data in Table S5. Each data point in the plots represents an average of at least 3 independent measurements.

**Table S7.** Maximal absorbance at the  $n \rightarrow \pi^*$  band ( $A_{\max}$ ) and maximal fluorescence intensity ( $I_F$ )\* for 5  $\mu\text{M}$  *syn*-(Me,Me)bimane in the presence of varying concentrations of  $\text{NaBPh}_4$  in THF and  $\text{H}_2\text{O}$ .  $A_{\max}$  and  $I_F$  are in %, relative to their values in the absence of the salt. Each value is averaged over the cited number of samples, and the standard deviation is given in parentheses.

| Solvent              | [ $\text{NaBPh}_4$ ]<br>(mM) | Number of<br>samples | $A_{\max}$ | $I_F^*$<br>(uncorrected) | $I_F^*$<br>(Absorbance-<br>corrected) |
|----------------------|------------------------------|----------------------|------------|--------------------------|---------------------------------------|
| THF                  | $5.0 \times 10^{-3}$         | 3                    | 98(3)      | 93.8(9)                  | 96(4)                                 |
|                      | $5.0 \times 10^{-2}$         | 3                    | 92(7)      | 79.9(2)                  | 87(8)                                 |
|                      | 0.25                         | 3                    | 90(4)      | 50(7)                    | 56(6)                                 |
|                      | 0.50                         | 3                    | 82(6)      | 32.5(8)                  | 40(4)                                 |
|                      | 1.0                          | 2                    | 78.2(7)    | 20.3(5)                  | 25.6(5)                               |
|                      | 2.5                          | 2                    | 75(1)      | 10.1(2)                  | 13.4(6)                               |
|                      | 5.0                          | 3                    | 71(6)      | 5.5(2)                   | 7.7(6)                                |
|                      | 7.5                          | 2                    | 72(4)      | 3.90(5)                  | 5.4(2)                                |
| $\text{H}_2\text{O}$ | $5.0 \times 10^{-3}$         | 3                    | 100(4)     | 99.9(4)                  | 100(4)                                |
|                      | $5.0 \times 10^{-2}$         | 3                    | 98(4)      | 99.4(6)                  | 102(3)                                |
|                      | 0.25                         | 3                    | 100(3)     | 97.2(1)                  | 99(3)                                 |
|                      | 0.50                         | 3                    | 99(2)      | 94.6(3)                  | 96(1)                                 |
|                      | 1.0                          | 3                    | 97(5)      | 91.0(5)                  | 94(5)                                 |
|                      | 2.5                          | 3                    | 97(7)      | 79.7(3)                  | 83(5)                                 |
|                      | 5.0                          | 3                    | 96(7)      | 63(4)                    | 66(7)                                 |
|                      | 7.5                          | 3                    | 96(6)      | 54(1)                    | 57(4)                                 |
|                      | 10.0                         | 3                    | 97(6)      | 47.0(9)                  | 49(1)                                 |

\*  $\lambda_{\text{ex}}$  (nm): THF, 370;  $\text{H}_2\text{O}$ , 390.

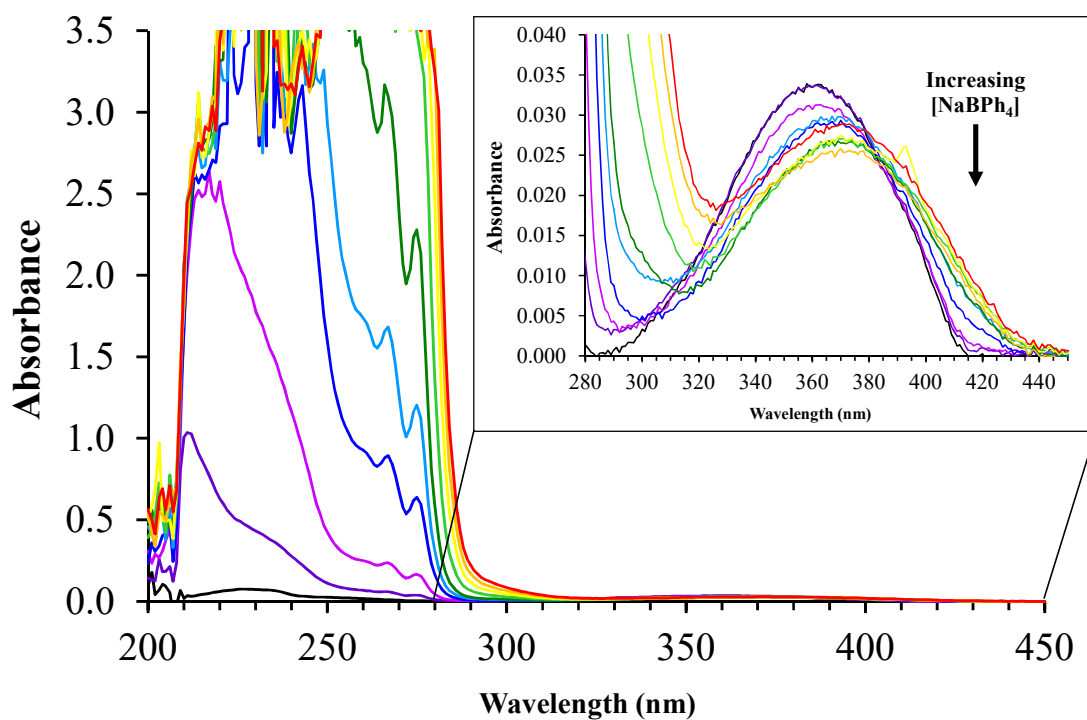

**Figure S43.** UV-Vis absorbance spectra of 5  $\mu\text{M}$  *syn*-(Me,Me)bimane in THF, in the presence of increasing concentrations of NaBPh<sub>4</sub>. The plots correspond to [NaBPh<sub>4</sub>] = 0,  $5.0 \times 10^{-3}$ ,  $5.0 \times 10^{-2}$ , 0.25, 0.50, 1.0, 2.5, 5.0, 7.5, 10.0 mM.

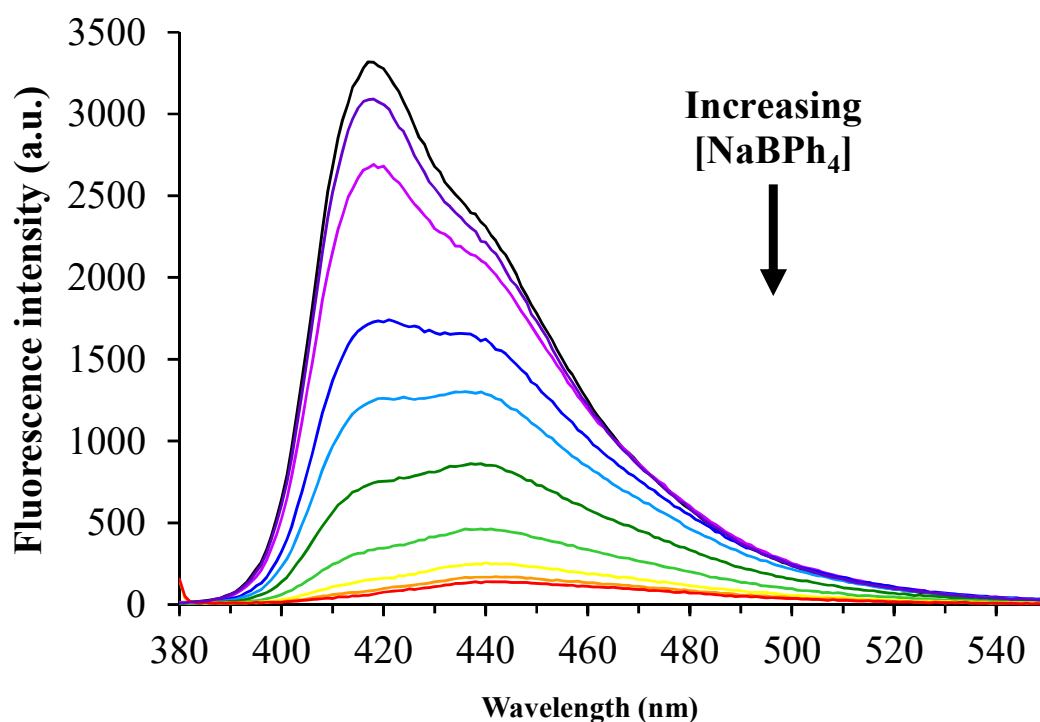

**Figure S44.** Fluorescence emission spectra of 5  $\mu\text{M}$  *syn*-(Me,Me)bimane in THF, in the presence of increasing concentrations of NaBPh<sub>4</sub> ( $\lambda_{\text{ex}} = 370$  nm). The plots correspond to [NaBPh<sub>4</sub>] = 0,  $5.0 \times 10^{-3}$ ,  $5.0 \times 10^{-2}$ , 0.25, 0.50, 1.0, 2.5, 5.0, 7.5, 10.0 mM.

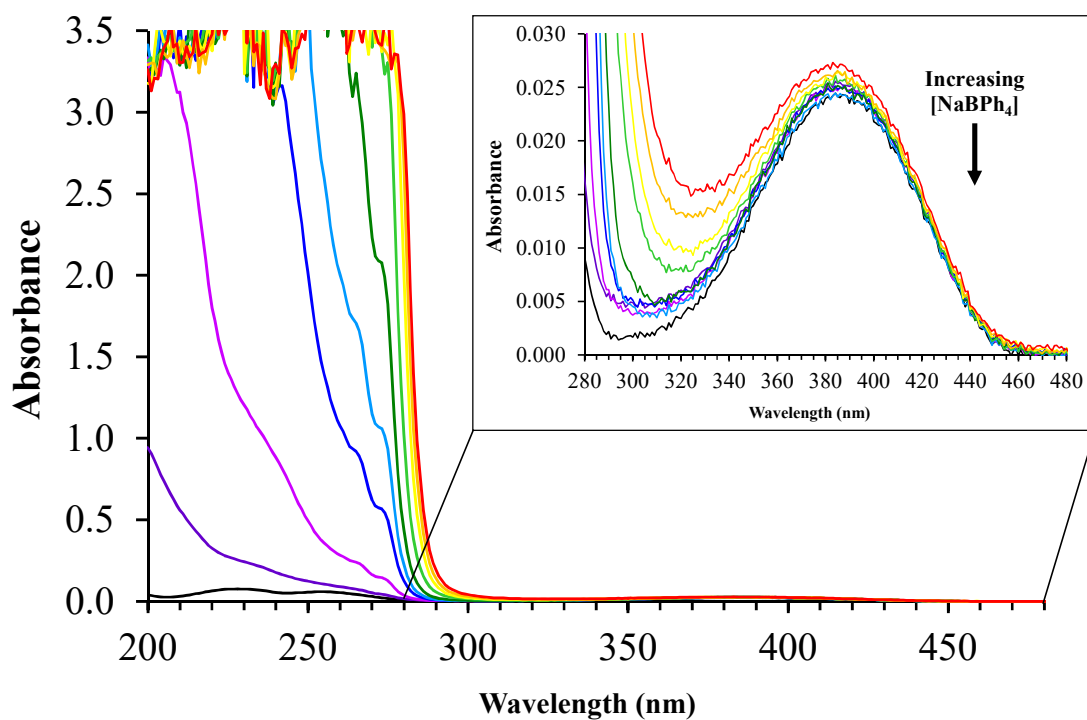

**Figure S45.** UV-Vis absorbance spectra of 5  $\mu$ M mM *syn*-(Me,Me)bimane in H<sub>2</sub>O, in the presence of increasing concentrations of NaBPh<sub>4</sub>. The plots correspond to [NaBPh<sub>4</sub>] = 0,  $5.0 \times 10^{-3}$ ,  $5.0 \times 10^{-2}$ , 0.25, 0.50, 1.0, 2.5, 5.0, 7.5, 10.0 mM.

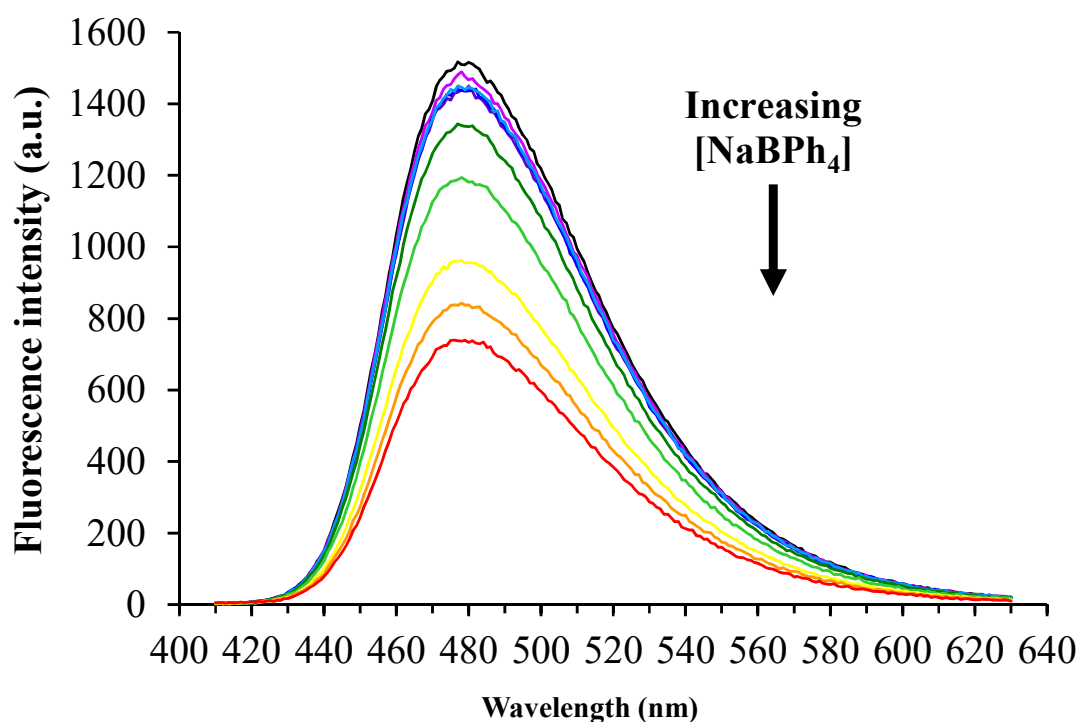

**Figure S46.** Fluorescence emission spectra of 5  $\mu$ M *syn*-(Me,Me)bimane in H<sub>2</sub>O, in the presence of increasing concentrations of NaBPh<sub>4</sub> ( $\lambda_{\text{ex}} = 385$  nm). The plots correspond to [NaBPh<sub>4</sub>] = 0,  $5.0 \times 10^{-3}$ ,  $5.0 \times 10^{-2}$ , 0.25, 0.50, 1.0, 2.5, 5.0, 7.5, 10.0 mM.

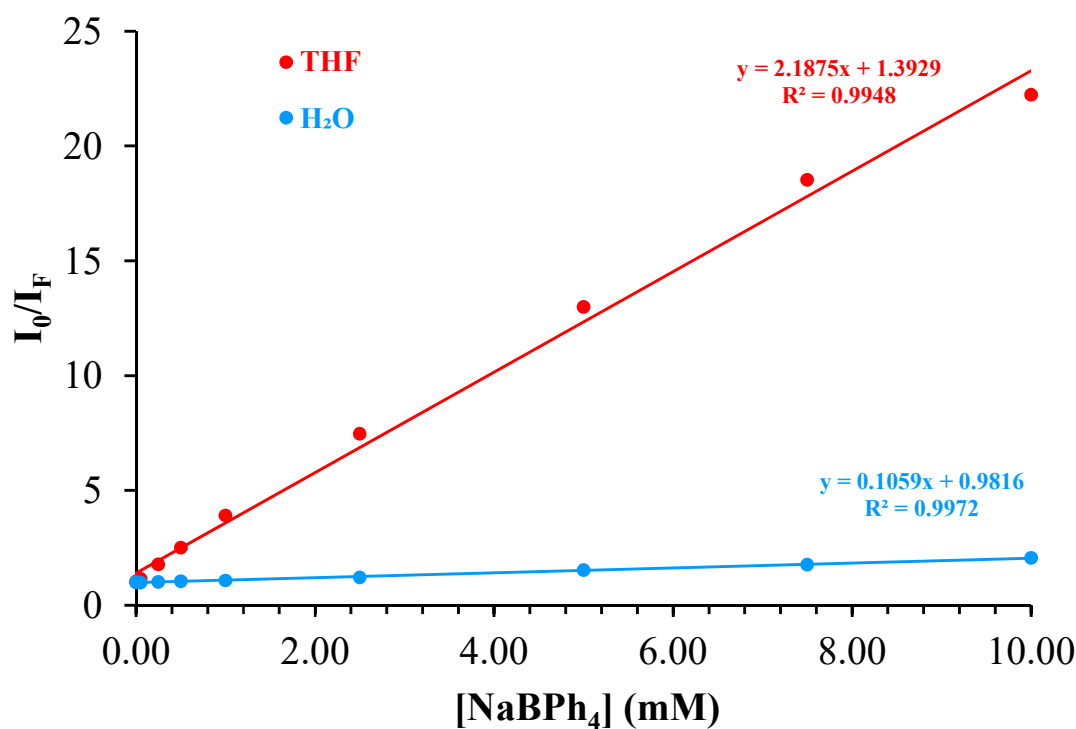

**Figure S47.** Stern-Volmer plots for the fluorescence quenching of 5  $\mu\text{M}$  *syn*-(Me,Me)bimane by NaBPh<sub>4</sub> in THF and H<sub>2</sub>O. The graphs were generated using the absorbance-corrected fluorescence data in Table S7. Each data point in the plots represents an average of at least 2 independent measurements.

#### Estimation of sodium-bimane binding constants and stoichiometry from

**fluorescence data.** A simple model has been previously employed by numerous authors to assess the stoichiometry and binding constants involved in static quenching, wherein the fluorophore binds multiple units of a given quencher.<sup>16</sup> This model assumes an equilibrium reaction,  $F + nQ \rightleftharpoons [FQ_n]$ , where F is the fluorophore, Q is the quencher, and  $[FQ_n]$  is a nonfluorescent complex. The fluorescence intensity is then related to the quencher concentration by the following equation:

$$\log\left(\frac{I_0 - I_F}{I_F}\right) = \log(K_A) + n \log[Q]$$

where  $I_0$  and  $I_F$  are the fluorescence intensities in the absence and presence of the quencher, respectively;  $K_A$  is the equilibrium (binding) constant; and  $[Q]$  is the quencher concentration. By plotting  $\log[(I_0 - I_F)/I_F]$  as a function of  $\log[Q]$ , and provided that a good linear fit is obtained, it is possible to extract both  $K_A$  and  $n$ . We have adopted this approach to analyze the sodium-bimane system. Figure S48 shows the corresponding plots for THF and aqueous solutions containing *syn*-

<sup>16</sup> For examples, see: (a) J. Min, X. Meng-Xia, Z. Dong, L. Yuan, L. Xiao-Yu and C. Xing, *J. Mol. Struct.*, 2004, **692**, 71-80. (b) E. Froehlich, J. S. Mandeville, C. J. Jennings, R. Sedaghat-Herati and H. A. Tajmir-Riahi, *J. Phys. Chem. B*, 2009, **113**, 6986-6993.



(Me,Me)bimane and NaBPh<sub>4</sub>, generated from the absorbance-corrected fluorescence data given in Table S5, which represent averaged values from at least 3 independent data sets. The plots exhibit good linearity.

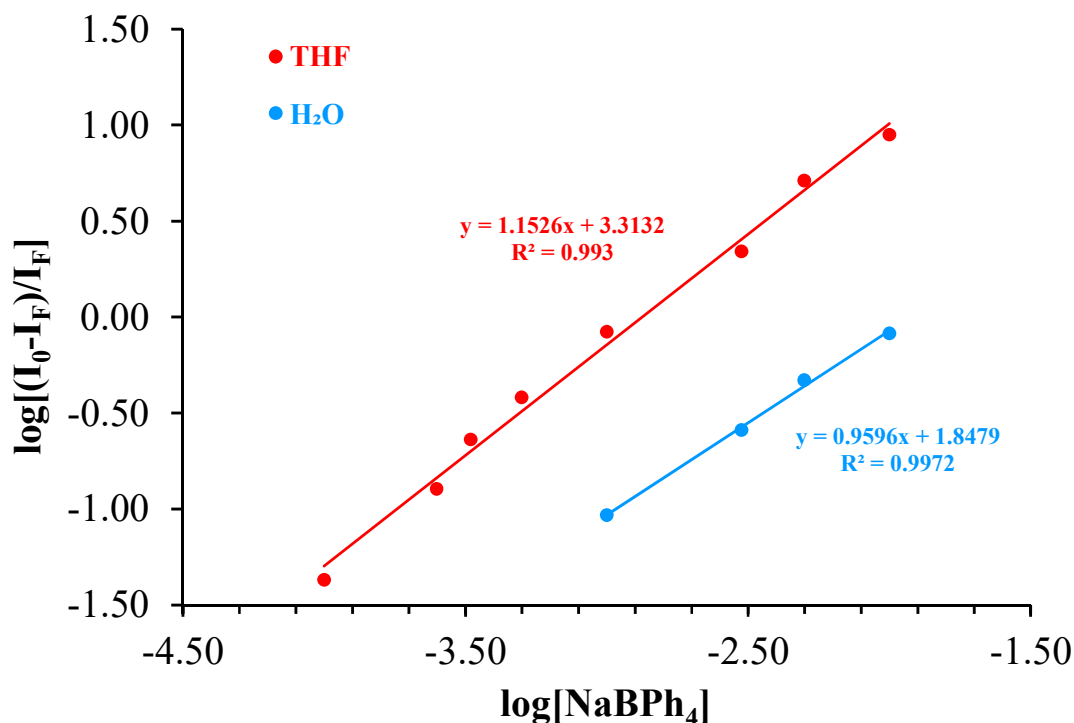

**Figure S48.** Plots of  $\log[(I_0 - I_F)/I_F]$  as a function of  $\log[\text{NaBPh}_4]$  for the fluorescence quenching of 1 mM *syn*-(Me,Me)bimane by NaBPh<sub>4</sub> in THF and H<sub>2</sub>O. Each data point represents an average of at least 3 independent measurements.

Similar plots were drawn for each individual data set, giving the following results:

| Solvent          | Data set        | <i>n</i>      | $\log(K_A)$   | $R^2$  |
|------------------|-----------------|---------------|---------------|--------|
| THF              | 1               | 1.18(8)       | 3.3(2)        | 0.9738 |
|                  | 2               | 1.02(3)       | 2.9(1)        | 0.9940 |
|                  | 3               | 1.3(1)        | 3.8(3)        | 0.9692 |
|                  | 4               | 1.21(3)       | 3.5(1)        | 0.9958 |
|                  | <i>Average:</i> | <i>1.2(1)</i> | <i>3.4(4)</i> | -      |
| H <sub>2</sub> O | 1               | 1.1(3)        | 2.3(7)        | 0.9057 |
|                  | 2               | 1.1(1)        | 2.1(3)        | 0.9825 |
|                  | 3               | 1.35(8)       | 2.7(2)        | 0.9926 |
|                  | <i>Average:</i> | <i>1.2(1)</i> | <i>2.4(3)</i> | -      |

The results tabulated above indicate a roughly 1:1 molar ratio between *syn*-(Me,Me)bimane and NaBPh<sub>4</sub> in both THF and H<sub>2</sub>O. They also show an apparent binding constant ( $K_A$ ) of about 2500 in THF, and 250 in H<sub>2</sub>O. It should be borne in mind that these constants include solvation contributions.

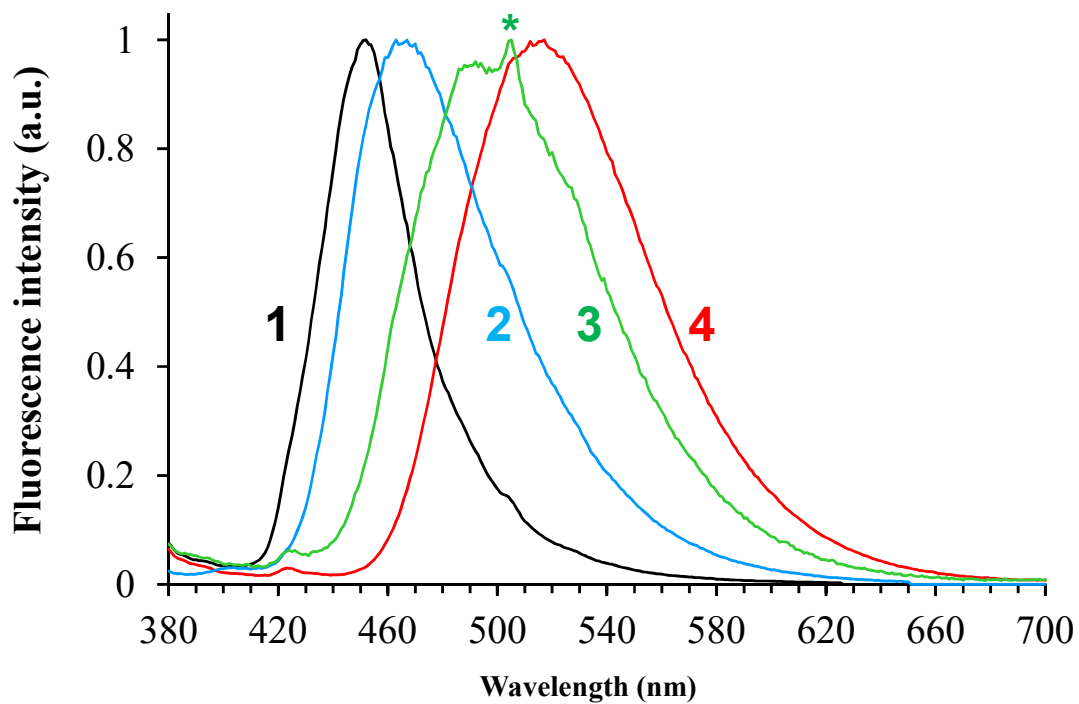

**Figure S49.** Solid-state fluorescence emission spectra of *syn*-(Me,Me)bimane (**1**) and complexes **2-4** ( $\lambda_{\text{ex}} = 370$  nm). All compounds were suspended in mineral oil. The sharp peak marked with an asterisk (\*) is an instrumentation artifact.

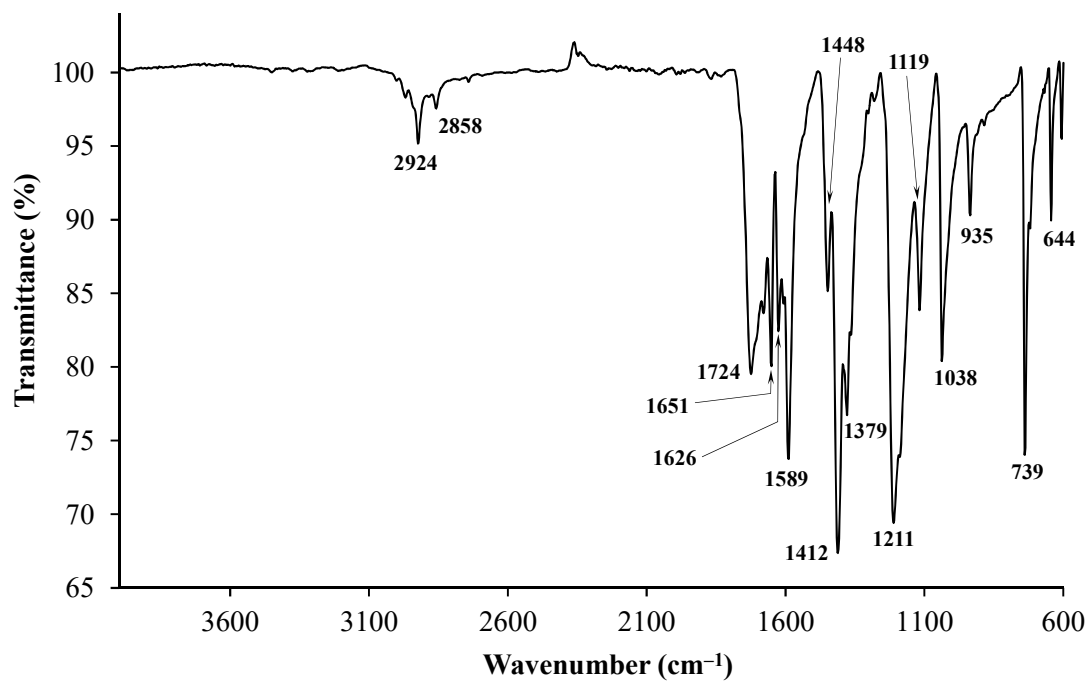

**Figure S50.** ATR infrared spectrum of solid *syn*-(Me,Me)bimane.

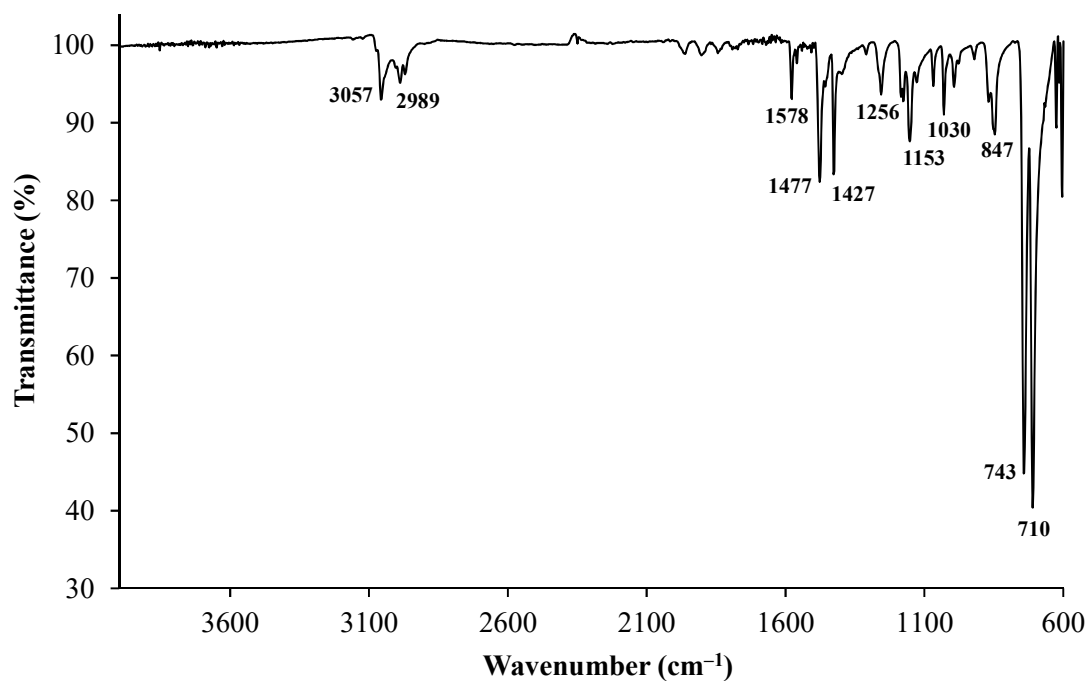

**Figure S51.** ATR infrared spectrum of solid NaBPh<sub>4</sub>.

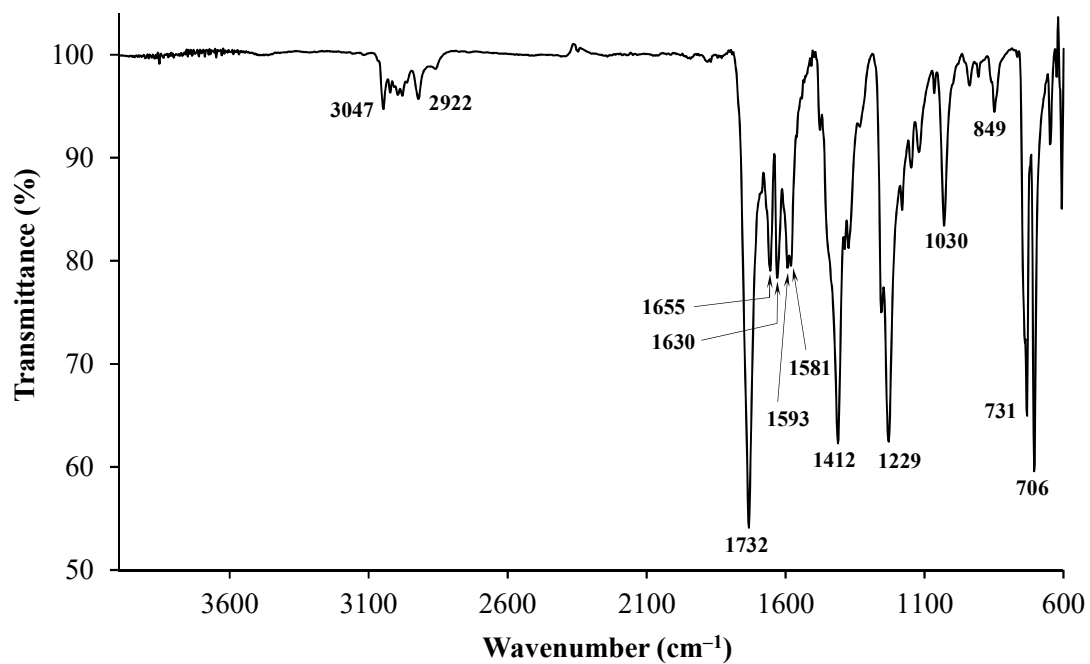

**Figure S52.** ATR infrared spectrum of crystalline complex 2.

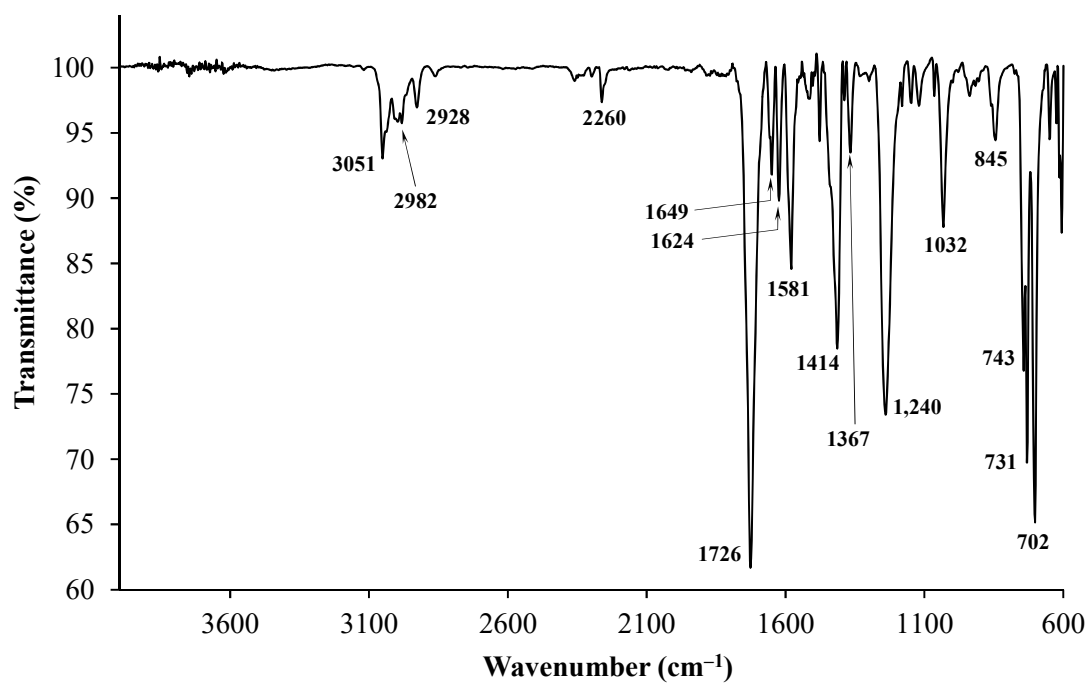

**Figure S53.** ATR infrared spectrum of crystalline complex 3.

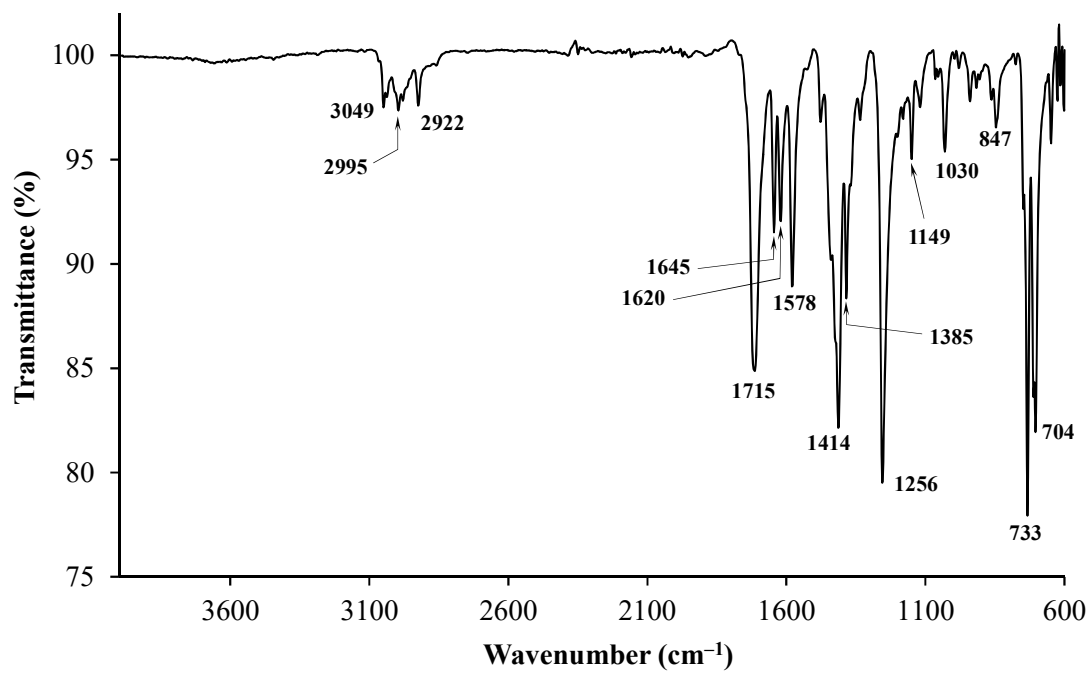

**Figure S54.** ATR infrared spectrum of crystalline complex 4.
